# Supplementary material
Source: publisher figshare collection journal article supplement (https://tandf.figshare.com/articles/dataset/_/5328013)

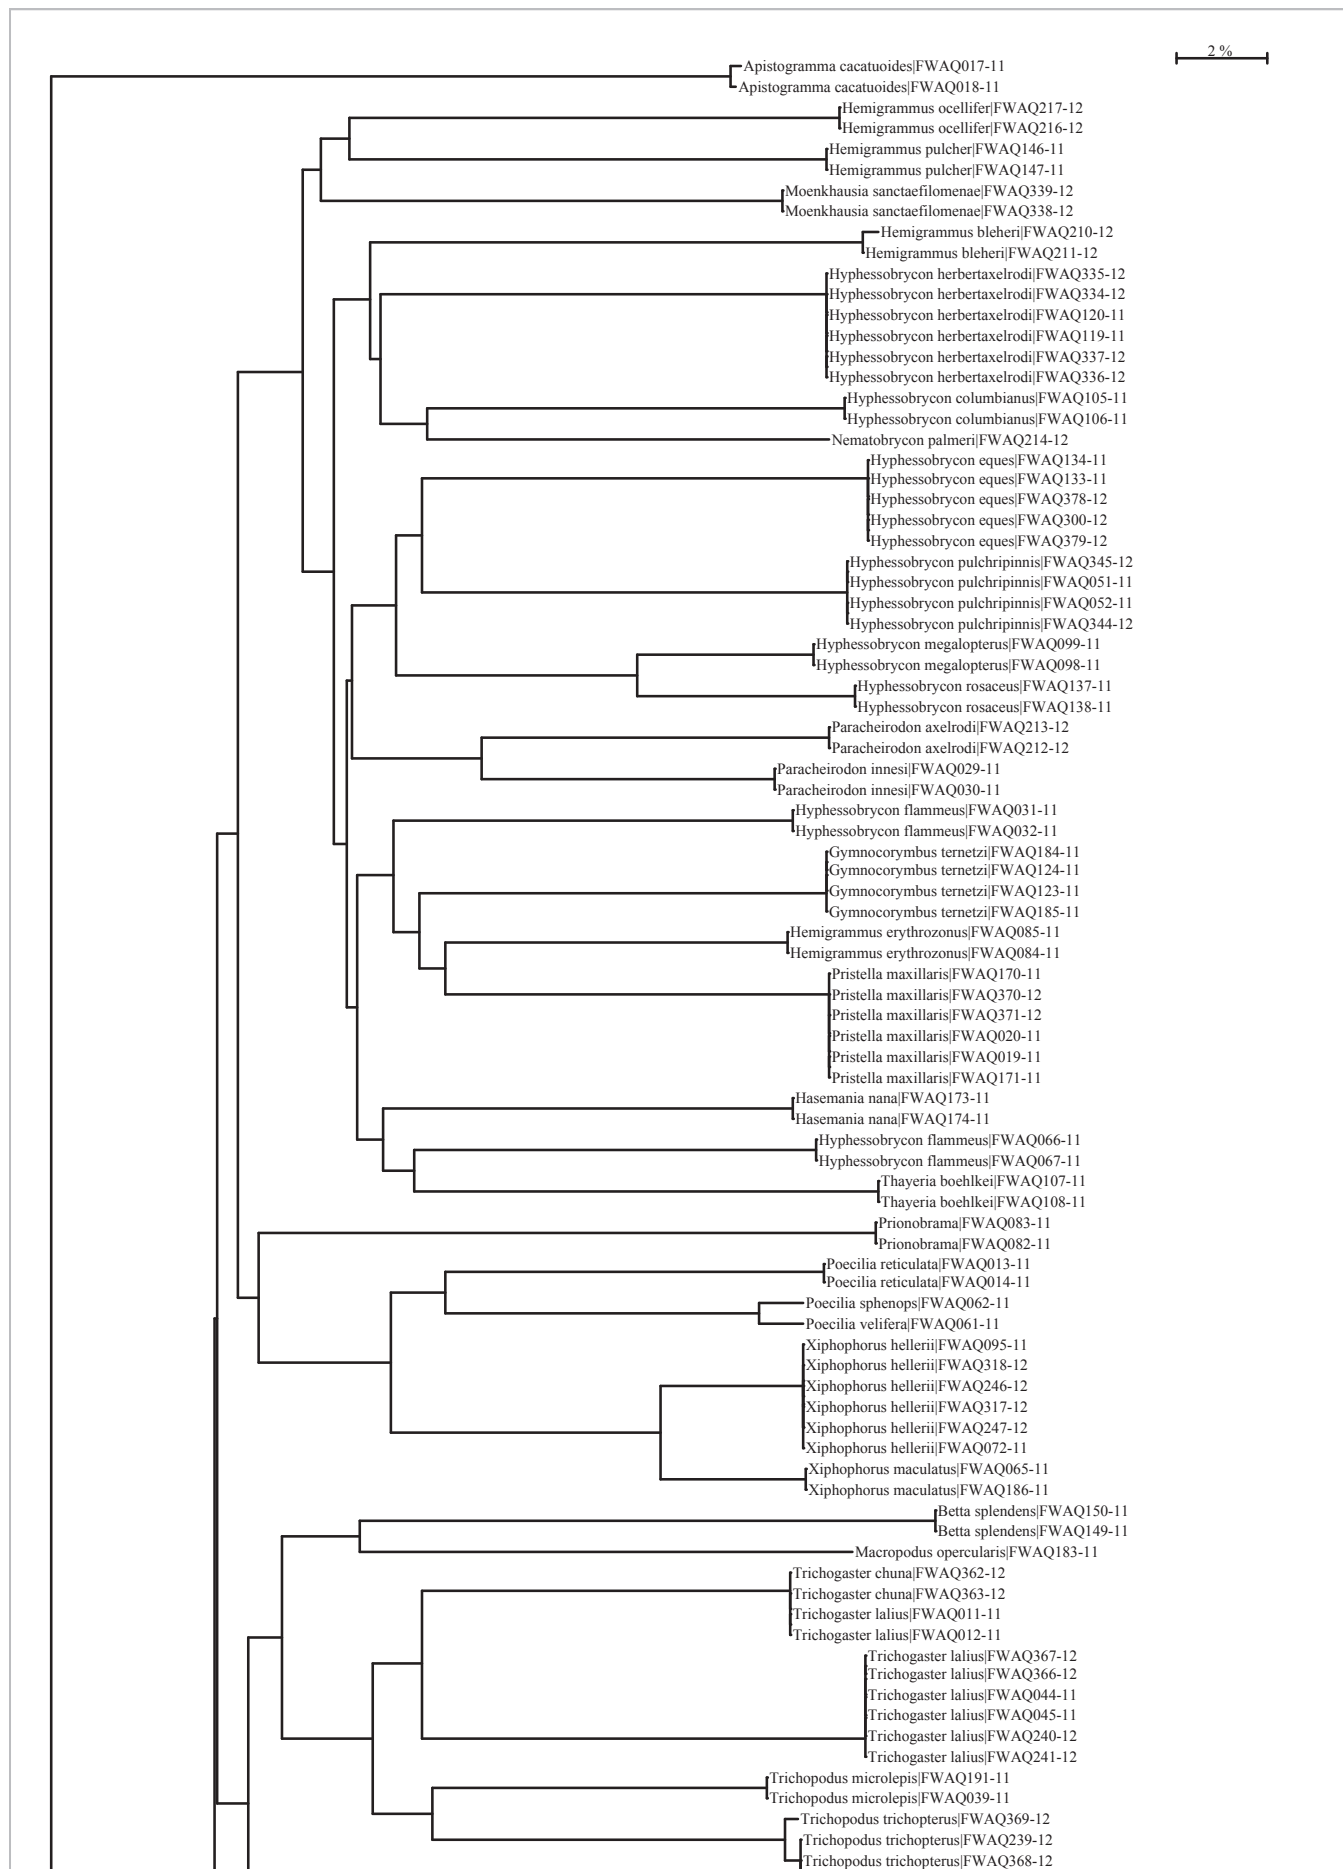

Supplementary Material B: Phylogenetic tree of ornamental freshwater fish traded in the South African aquarium trade

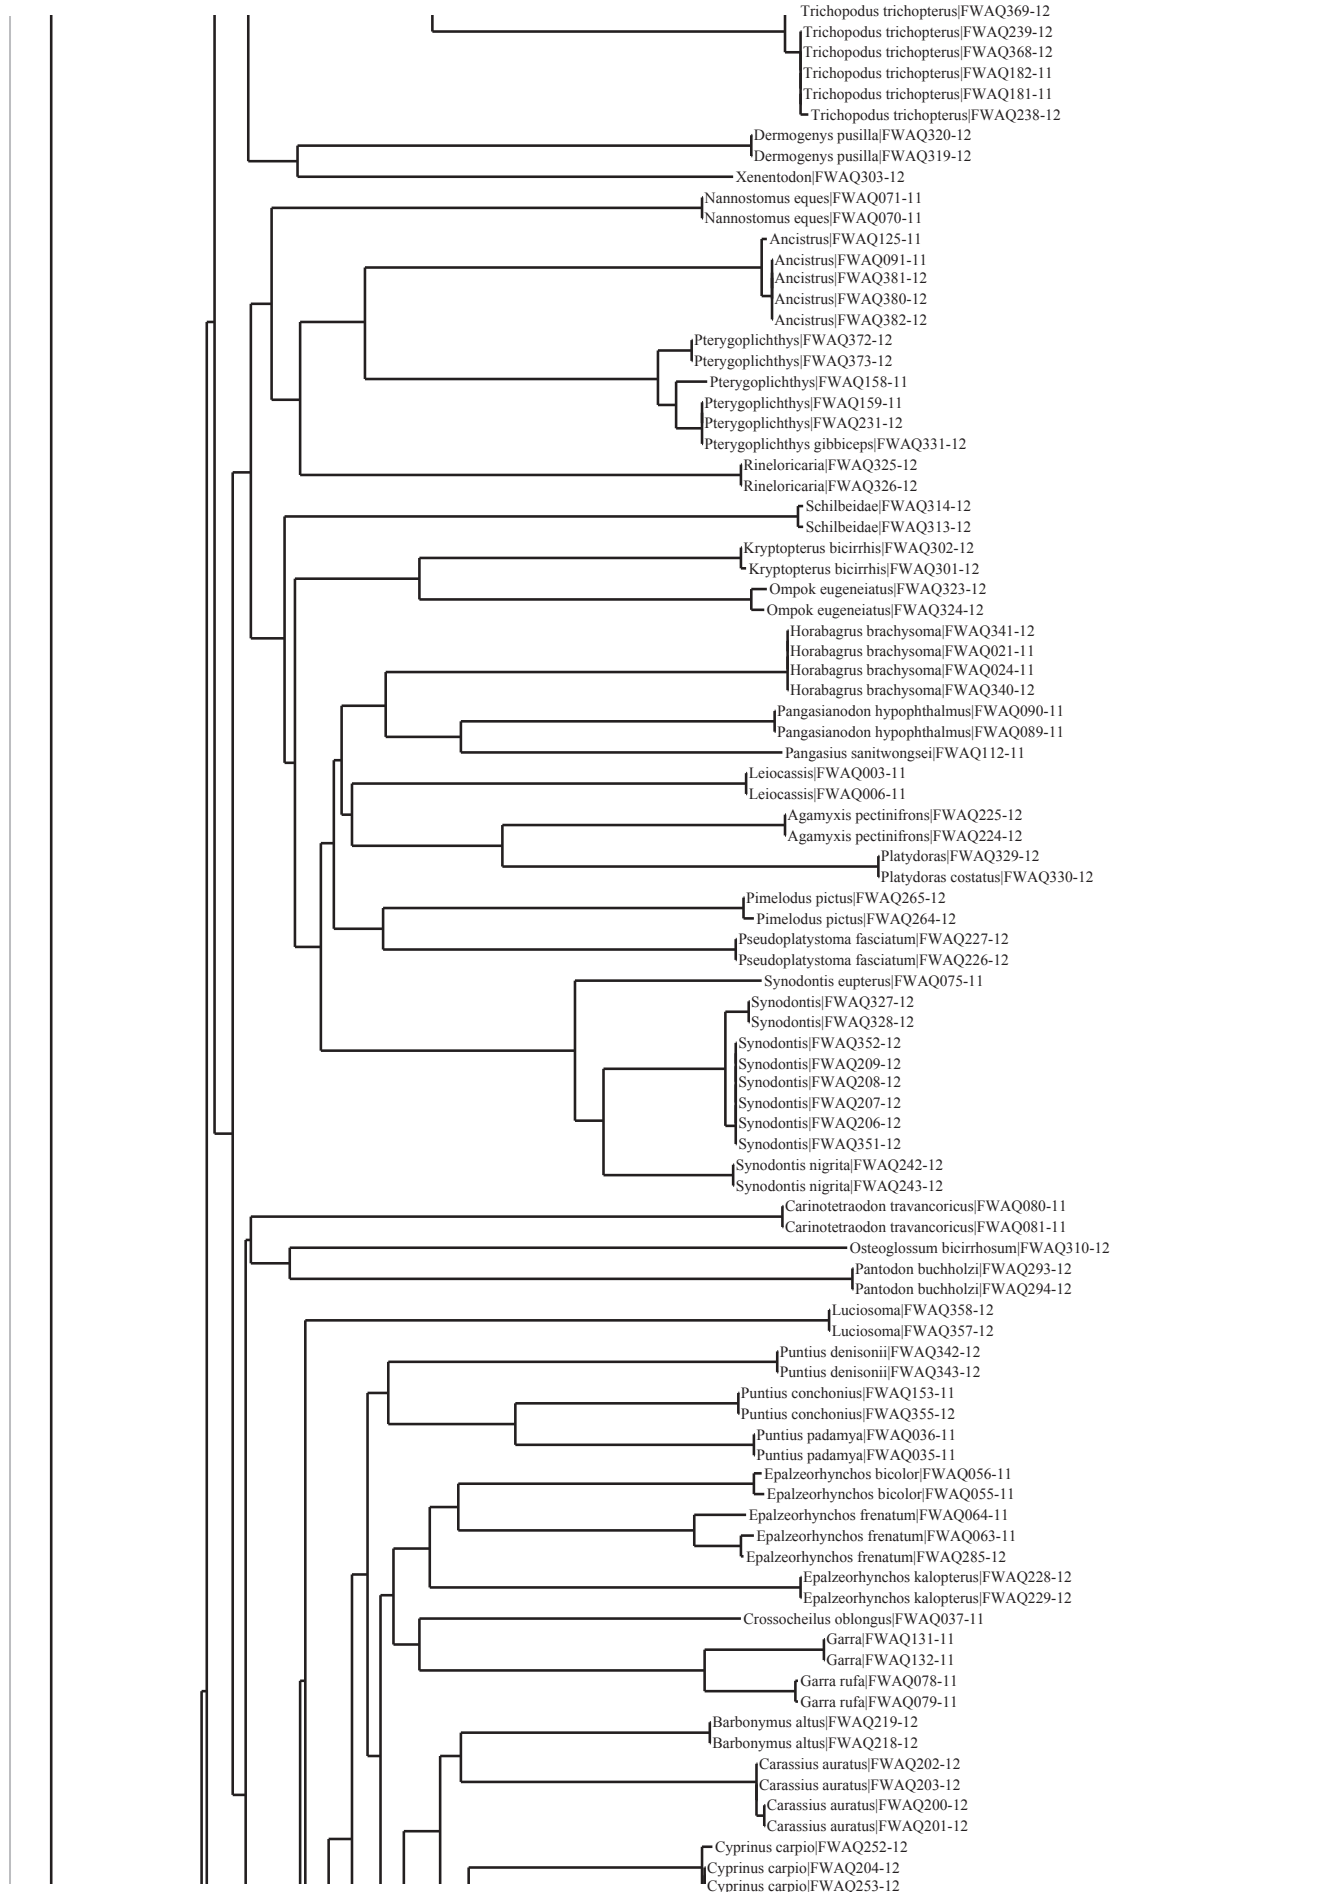

Supplementary Material B: Phylogenetic tree of ornamental freshwater fish traded in the South African aquarium trade

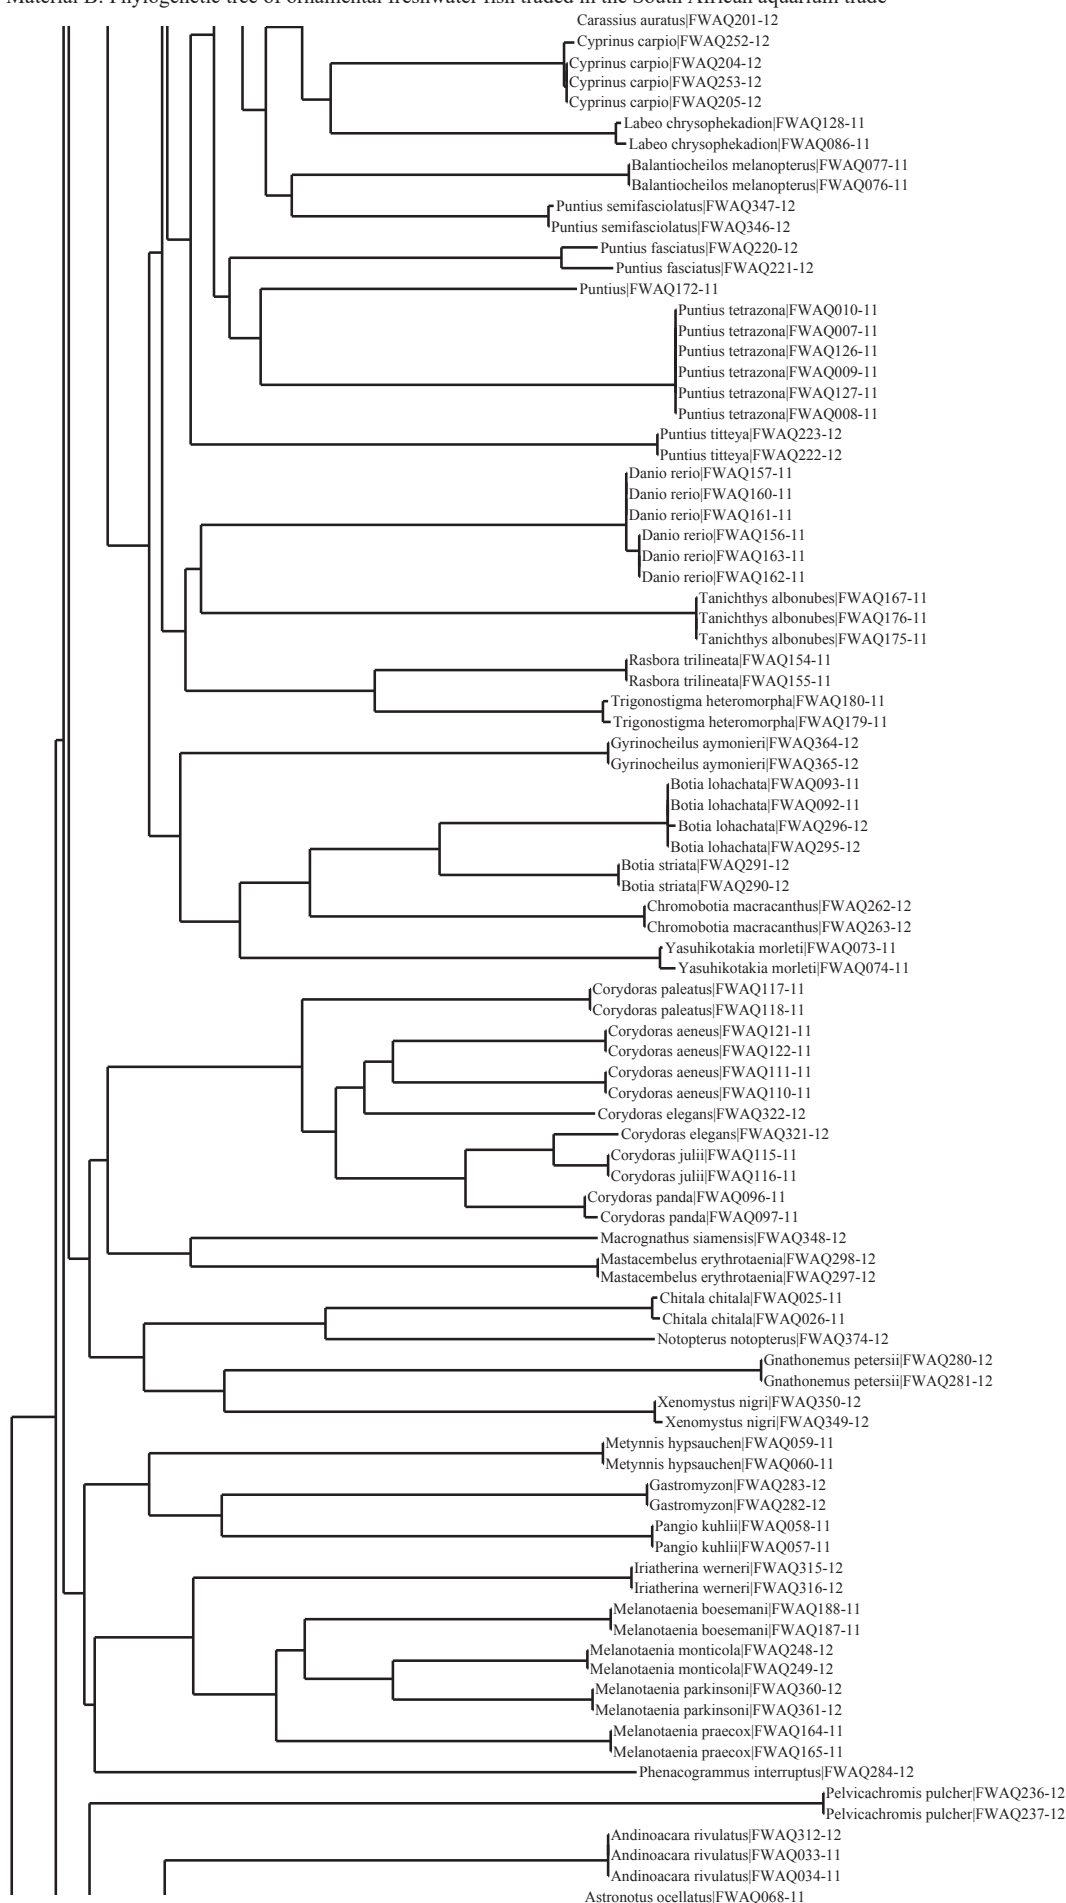

Supplementary Material B: Phylogenetic tree of ornamental freshwater fish traded in the South African aquarium trade

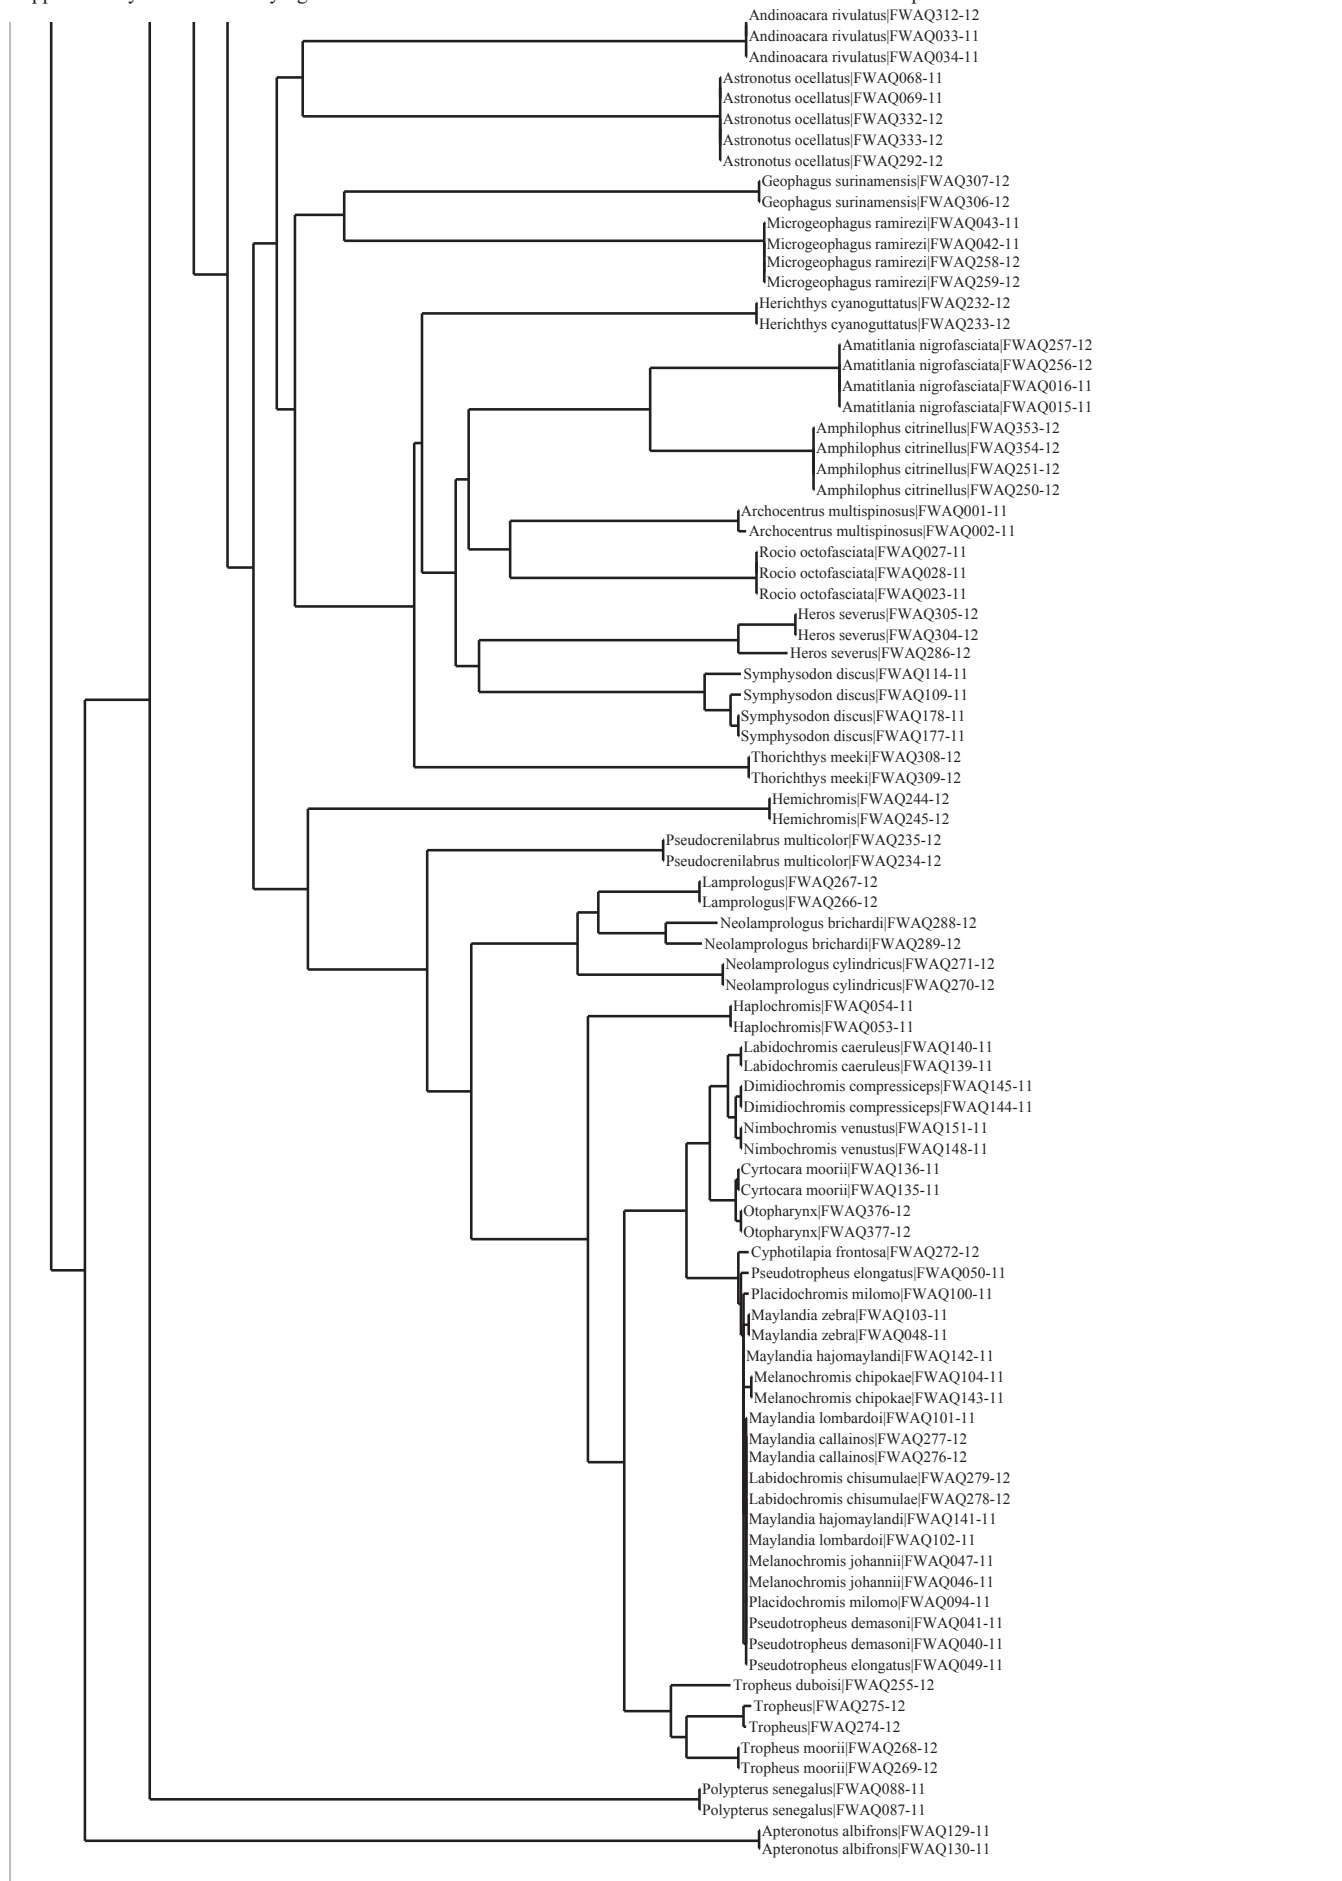

Supplement: Supplementary file 1 [file 1]
