# Supplementary material
Source: publisher figshare collection journal article supplement (https://tandf.figshare.com/articles/dataset/_/5328013)
Supplement: Supplementary file 2 [file 1]

**Supplementary Material A: List of ornamental freshwater fish trade names in South Africa and genetic database identifications**

| <u>SAIAB<br/>accession<br/>number</u> | <u>GenBank<br/>number</u> | <u>BOLD<br/>BIN<br/>number</u> | <u>BOLD Process<br/>ID(s)</u>                           | <u>Family</u> | <u>Region<br/>of origin</u> | <u>Trade name</u>              | <u>Associated<br/>common name/s<br/>(1: FishBase<br/>(FAO/AFS), 2:<br/>Hensen, Ploeg &amp;<br/>Fossa 2010, 3:<br/>Baensch's<br/>Aquarium Atlas</u> | <u>Inferred<br/>scientific<br/>name(s)</u>                                        | <u>BOLD<br/>published<br/>database match</u> | <u>Genetic ID<br/>result<br/>(BOLD)</u> | <u>GenBank match</u>                  | <u>Genetic ID<br/>result<br/>(GenBank)</u> |
|---------------------------------------|---------------------------|--------------------------------|---------------------------------------------------------|---------------|-----------------------------|--------------------------------|----------------------------------------------------------------------------------------------------------------------------------------------------|-----------------------------------------------------------------------------------|----------------------------------------------|-----------------------------------------|---------------------------------------|--------------------------------------------|
| 186038                                | KU568757                  | BOLD:<br>AAE5217               | FWAQ001-11,<br>FWAQ002-11                               | Cichlidae     | North<br>America            | Rainbow<br>cichlid             | Rainbow cichlid<br>(1, 2)                                                                                                                          | <i>Archocentrus<br/>multispinosus</i>                                             | <i>Archocentrus<br/>multispinosus</i>        | Match                                   | <i>Archocentrus<br/>multispinosus</i> | Match                                      |
| 186039                                | KU568899                  | BOLD:<br>AAZ4703               | FWAQ003-11,<br>FWAQ006-11                               | Bagridae      | Asia                        | Bumblebee<br>catfish           | Bumblebee<br>catfish (1)                                                                                                                           | <i>Batrachoglanis<br/>acanthochiroides</i> ;<br><i>Pseudomystus<br/>siamensis</i> |                                              | No genetic<br>ID                        |                                       | No genetic<br>ID                           |
| 186042                                | KU568737                  | BOLD:<br>AAD6407               | FWAQ256-12,<br>FWAQ257-12                               | Cichlidae     | South<br>America            | Convict<br>cichlids            | Convict cichlid<br>(1, 2)                                                                                                                          | <i>Amatitlania<br/>nigrofasciata</i>                                              | <i>Amatitlania<br/>nigrofasciata</i>         | Match                                   | <i>Amatitlania<br/>pectifron</i>      | Match                                      |
| 186042                                | KU569050                  | BOLD:<br>AAY7699               | FWAQ011-11,<br>FWAQ012-11                               | Osphronemidae | Asia                        | Neon red dwarf<br>male gourami | Dwarf gourami<br>(1, 2)                                                                                                                            | <i>Trichogaster<br/>lalius</i>                                                    |                                              | No genetic<br>ID                        |                                       | No genetic<br>ID                           |
| 186043                                | KU569009                  | BOLD:<br>AAD9761               | FWAQ007-11,<br>FWAQ008-11                               | Cyprinidae    | Asia                        | Green tiger<br>barb            | Green tiger barb<br>(1)                                                                                                                            | <i>Puntigrus<br/>tetrazona</i>                                                    | <i>Puntius<br/>tetrazona</i>                 | Match                                   | <i>Puntigrus<br/>tetrazona</i>        | Match                                      |
| 186044                                | KU568970                  | BOLD:<br>ACE3484               | FWAQ013-11,<br>FWAQ014-11                               | Poeciliidae   | South<br>America            | Common<br>guppy                | Guppy (1, 2)                                                                                                                                       | <i>Poecilia<br/>reticulata</i>                                                    | <i>Poecilia<br/>reticulata</i>               | Match                                   | <i>Poecilia<br/>reticulata</i>        | Match                                      |
| 186045                                | KU569012                  | BOLD:<br>AAD9761               | FWAQ009-11,<br>FWAQ010-11                               | Cyprinidae    | Asia                        | Gold tiger barb                | Tiger barb (1, 2)                                                                                                                                  | <i>Puntigrus<br/>tetrazona</i>                                                    | <i>Puntius<br/>tetrazona</i>                 | Match                                   | <i>Puntigrus<br/>tetrazona</i>        | Match                                      |
| 186046                                | KU568739                  | BOLD:<br>AAD6407               | FWAQ015-11,<br>FWAQ016-11                               | Cichlidae     | South<br>America            | Albino convict<br>cichlid      | Convict cichlid<br>(1, 2)                                                                                                                          | <i>Amatitlania<br/>nigrofasciata</i>                                              | <i>Amatitlania<br/>nigrofasciata</i>         | Match                                   | <i>Amatitlania<br/>pectifron</i>      | Match                                      |
| 186047                                | KU568753                  | BOLD:<br>AAZ4624               | FWAQ017-11,<br>FWAQ018-11                               | Cichlidae     | South<br>America            | Cockatoo<br>cichlid            | Cockatoo<br>cichlid (1, 2, 3)                                                                                                                      | <i>Apistogramma<br/>cacatuoides</i>                                               | <i>Apistogramma<br/>cacatuoides</i>          | Match                                   |                                       | No genetic<br>ID                           |
| 186048                                | KU568978                  | BOLD:<br>ACF4350               | FWAQ019-11,<br>FWAQ020-11                               | Characidae    | South<br>America            | Gold pristella<br>tetra        | X-ray tetra (1),<br>Pristella tetra<br>(2)                                                                                                         | <i>Pristella<br/>maxillaris</i>                                                   |                                              | No genetic<br>ID                        |                                       | No genetic<br>ID                           |
| 186049                                | KU568859                  | BOLD:<br>AAX2438               | FWAQ021-11,<br>FWAQ024-11,<br>FWAQ340-12,<br>FWAQ341-12 | Bagridae      | Asia                        | Asian sun<br>catfish           | Sun catfish (2)                                                                                                                                    | <i>Horabagrus<br/>brachysoma</i>                                                  | <i>Horabagrus<br/>brachysoma</i>             | Match                                   | <i>Horabagrus<br/>brachysoma</i>      | Match                                      |
| 186050                                | KU569023                  | BOLD:<br>AAD1423               | FWAQ023-11                                              | Cichlidae     | Africa                      | Jewel cichlid                  | Jewel cichlid (2)                                                                                                                                  | <i>Hemichromis<br/>bimaculatus</i>                                                | <i>Rocia<br/>octofasciata</i>                | Mismatch                                | <i>Rocia<br/>octofasciata</i>         | Mismatch                                   |
| 186052                                | KU568782                  | BOLD:<br>AAE9017               | FWAQ025-11,<br>FWAQ026-11                               | Notopteridae  | Asia                        | Clown knife<br>fish            | Clown knifefish<br>(1, 2)                                                                                                                          | <i>Chitala chitala</i> ;<br><i>C. ornata</i>                                      |                                              | No genetic<br>ID                        |                                       | No genetic<br>ID                           |
| 186056                                | KU569021                  | BOLD:<br>AAD1423               | FWAQ027-11,<br>FWAQ028-11                               | Cichlidae     | North<br>America            | Jack dempsey<br>cichlid        | Jack Dempsey<br>(1, 2)                                                                                                                             | <i>Rocio<br/>octofasciata</i>                                                     | <i>Rocia<br/>octofasciata</i>                | Match                                   | <i>Rocio<br/>octofasciata</i>         | Match                                      |
| 186058                                | KU568959                  | BOLD:<br>AAY5671               | FWAQ029-11,<br>FWAQ030-11                               | Characidae    | South<br>America            | Neon medium<br>tetra           | Neon tetra (1, 2)                                                                                                                                  | <i>Paracheiroduon<br/>innesi</i>                                                  | <i>Paracheiroduon<br/>innesi</i>             | Match                                   | <i>Paracheiroduon<br/>innesi</i>      | Match                                      |
| 186059                                | KU568870                  | BOLD:<br>ACJ1542               | FWAQ031-11,<br>FWAQ032-11                               | Characidae    | South<br>America            | Gold rio tetra                 | Rio tetra (1)                                                                                                                                      | <i>Hyphessobrycon<br/>flammeus</i>                                                | <i>Astyanax cf.<br/>pampa</i>                | Mismatch                                | <i>Hyphessobrycon<br/>flammeus</i>    | Match                                      |

|        |          |                  |                                                                                       |               |                  |                                |                                         |                                                    |                                     |                                    |                                     |                                    |
|--------|----------|------------------|---------------------------------------------------------------------------------------|---------------|------------------|--------------------------------|-----------------------------------------|----------------------------------------------------|-------------------------------------|------------------------------------|-------------------------------------|------------------------------------|
| 186061 | KU568751 | BOLD:<br>ACW5790 | FWAQ033-11,<br>FWAQ034-11                                                             | Cichlidae     | South<br>America | Golden saum<br>cichlid         | Green terror (1,<br>2), Goldsaum<br>(1) | <i>Andinoacara<br/>rivulatus</i>                   | <i>Andinoacara<br/>rivulatus</i>    | Match                              | <i>Andinoacara<br/>rivulatus</i>    | Match                              |
| 186063 | KU569006 | BOLD:<br>AAU1558 | FWAQ035-11,<br>FWAQ036-11                                                             | Cyprinidae    | Asia             | Odessa barb                    | Odessa barb (2)                         | <i>Pethia padamya</i>                              | <i>Puntius padamya</i>              | Match                              | <i>Pethia padamya</i>               | Match                              |
| 186065 | KU568798 | BOLD:<br>AAU3843 | FWAQ037-11                                                                            | Cyprinidae    | Asia             | Siamese algae<br>eaters        | Siamese algae<br>eater (1)              | <i>Crossocheilus<br/>oblongus</i>                  | <i>Crossocheilus<br/>atrilimes</i>  | Mismatch                           | <i>Crossocheilus<br/>atrilimes</i>  | Mismatch                           |
| 186066 | KU569059 | BOLD:<br>AAZ4938 | FWAQ039-11,<br>FWAQ191-11                                                             | Osphronemidae | Asia             | Moonlight<br>gourami           | Moonlight<br>gourami (1)                | <i>Trichogaster<br/>microlepis</i>                 |                                     | No genetic<br>ID                   |                                     | No genetic<br>ID                   |
| 186067 | KU568989 | BOLD:<br>AAX2832 | FWAQ040-11,<br>FWAQ041-11                                                             | Cichlidae     | Africa           | Demasoni<br>malawi cichlid     | Pseudotropheus<br>demasoni (2)          | <i>Pseudotropheus<br/>demasoni</i>                 |                                     | No genetic<br>ID (Malawi<br>group) |                                     | No genetic<br>ID (Malawi<br>group) |
| 186068 | KU568930 | BOLD:<br>AAD0746 | FWAQ042-11,<br>FWAQ043-11                                                             | Cichlidae     | South<br>America | Ramerezi<br>cichlid            | Ram cichlid (1),<br>Ramirezi (2)        | <i>Mikrogeophagus<br/>ramirezi</i>                 | <i>Mikrogeophagus<br/>ramirezi</i>  | Match                              | <i>Mikrogeophagus<br/>ramirezi</i>  | Match                              |
| 186069 | KU569053 | BOLD:<br>AAH8213 | FWAQ044-11,<br>FWAQ045-11,<br>FWAQ240-12,<br>FWAQ241-12,<br>FWAQ366-12,<br>FWAQ367-12 | Osphronemidae | Asia             | Red robin<br>gourami           | not available                           | <i>Trichogaster sp.</i>                            |                                     | No genetic<br>ID                   |                                     | No genetic<br>ID                   |
| 186070 | KU568918 | BOLD:<br>AAX2832 | FWAQ046-11,<br>FWAQ047-11                                                             | Cichlidae     | Africa           | Johanni<br>malawi cichlid      | Pseudotropheus<br>johannii (2)          | <i>Pseudotropheus<br/>johannii</i>                 |                                     | No genetic<br>ID (Malawi<br>group) |                                     | No genetic<br>ID (Malawi<br>group) |
| 186071 | KU568914 | BOLD:<br>AAX2832 | FWAQ048-11,<br>FWAQ103-11                                                             | Cichlidae     | Africa           | Albino zebra<br>malawi cichlid | Zebra malawi<br>cichlid (1)             | <i>Maylandia zebra</i>                             |                                     | No genetic<br>ID (Malawi<br>group) |                                     | No genetic<br>ID (Malawi<br>group) |
| 186072 | KU568991 | BOLD:<br>AAX2832 | FWAQ049-11,<br>FWAQ050-11                                                             | Cichlidae     | Africa           | Elongatus<br>malawi cichlid    | Pseudotropheus<br>elongatus (2)         | <i>Pseudotropheus<br/>elongatus</i>                |                                     | No genetic<br>ID (Malawi<br>group) |                                     | No genetic<br>ID (Malawi<br>group) |
| 186073 | KU568882 | BOLD:<br>AAZ4713 | FWAQ051-11,<br>FWAQ052-11                                                             | Characidae    | South<br>America | Lemon tetra                    | Lemon tetra (1,<br>2)                   | <i>Hyphessobrycon<br/>pulchripinnis</i>            |                                     | No genetic<br>ID                   |                                     | No genetic<br>ID                   |
| 186093 | KU568840 | BOLD:<br>AAB6620 | FWAQ053-11,<br>FWAQ054-11                                                             | Cichlidae     | Africa           | Obliquidens<br>malawi cichlid  | Obliquidens<br>malawi cichlid<br>(2)    | <i>Haplochromis<br/>obliquidens</i>                |                                     | No genetic<br>ID (Malawi<br>group) |                                     | No genetic<br>ID (Malawi<br>group) |
| 186094 | KU568817 | BOLD:<br>AAL0596 | FWAQ055-11,<br>FWAQ056-11                                                             | Cyprinidae    | Asia             | Red tail black<br>shark        | Redtail shark (1,<br>2)                 | <i>Epalzeorhynchos<br/>bicolor</i>                 | <i>Epalzeorhynchos<br/>bicolor</i>  | Match                              | <i>Epalzeorhynchos<br/>bicolor</i>  | Match                              |
| 186095 | KU568927 | BOLD:<br>AAZ3821 | FWAQ059-11,<br>FWAQ060-11                                                             | Serrasalminae | South<br>America | Silver dollar<br>tetra         | Silver dollar (1,<br>2)                 | <i>Metynnis<br/>argenteus; M.<br/>longispinnis</i> |                                     | No genetic<br>ID                   | <i>Metynnis<br/>hypsauchen</i>      | Ambiguous<br>trade name            |
| 186096 | KU568973 | BOLD:<br>AAD1756 | FWAQ061-11                                                                            | Poeciliidae   | South<br>America | Silver molly                   | not available                           | <i>Poecilia sp.</i>                                | <i>Poecilia<br/>sphenops</i>        | Ambiguous<br>trade name            | <i>Poecilia velifera</i>            | Ambiguous<br>trade name            |
| 186096 | KU568742 | BOLD:<br>AAA7015 | FWAQ353-12,<br>FWAQ354-12                                                             | Cichlidae     | North<br>America | King parrotfish                | not available                           | No match                                           | <i>Amphilophus<br/>citrinellus</i>  | Ambiguous<br>trade name            |                                     | No genetic<br>ID                   |
| 186097 | KU568972 | BOLD:<br>AAD1756 | FWAQ062-11                                                                            | Poeciliidae   | South<br>America | Black molly                    | Black molly (1,<br>2)                   | <i>Poecilia<br/>sphenops</i>                       | <i>Poecilia<br/>latipinna</i>       | Mismatch                           | <i>Poecilia<br/>latipinna</i>       | Mismatch                           |
| 186098 | KU568819 | BOLD:<br>AAV6502 | FWAQ063-11,<br>FWAQ064-11                                                             | Cyprinidae    | Asia             | Rainbow shark                  | Rainbow shark<br>(1, 2)                 | <i>Epalzeorhynchos<br/>frenatus</i>                | <i>Epalzeorhynchos<br/>frenatus</i> | Match                              | <i>Epalzeorhynchos<br/>frenatus</i> | Match                              |
| 186099 | KU569082 | BOLD:<br>AAB7239 | FWAQ065-11                                                                            | Poeciliidae   | North<br>America | Sunset moon<br>platy           | Southern platy<br>(2)                   | <i>Xiphophorus<br/>maculatus</i>                   | <i>Xiphophorus<br/>maculatus</i>    | Match                              | <i>Xiphophorus<br/>maculatus</i>    | Match                              |

|        |          |                  |                           |                |                    |                             |                               |                                          |                                          |                                    |                                          |                                    |
|--------|----------|------------------|---------------------------|----------------|--------------------|-----------------------------|-------------------------------|------------------------------------------|------------------------------------------|------------------------------------|------------------------------------------|------------------------------------|
| 186100 | KU568869 | BOLD:<br>AAC7094 | FWAQ066-11,<br>FWAQ067-11 | Characidae     | South<br>America   | Flame tetra                 | Flame tetra (1)               | <i>Hyphessobrycon<br/>flammeus</i>       | <i>Hyphessobrycon<br/>flammeus</i>       | Match                              | <i>Hyphessobrycon<br/>flammeus</i>       | Match                              |
| 186101 | KU568761 | BOLD:<br>AAD8258 | FWAQ068-11,<br>FWAQ069-11 | Cichlidae      | South<br>America   | Red tiger oscar<br>cichlid  | Oscar (1, 2)                  | <i>Astronotus<br/>ocellatus</i>          |                                          | No genetic<br>ID                   |                                          | No genetic<br>ID                   |
| 186102 | KU568936 | BOLD:<br>AAZ4665 | FWAQ070-11,<br>FWAQ071-11 | Lebiasinidae   | South<br>America   | Rocket pencil<br>tetra      | not available                 | No match                                 |                                          | No genetic<br>ID                   |                                          | No genetic<br>ID                   |
| 186103 | KU569081 | BOLD:<br>AAB8020 | FWAQ072-11                | Poeciliidae    | North<br>America   | Neon wag<br>swordtail       | Swordtail (1, 2,<br>3)        | <i>Xiphophorus<br/>hellerii</i>          | <i>Xiphophorus<br/>hellerii</i>          | Match                              | <i>Xiphophorus<br/>hellerii</i>          | Match                              |
| 186127 | KU569084 | BOLD:<br>AAZ4952 | FWAQ073-11,<br>FWAQ074-11 | Cobitidae      | Asia               | Skunk loach                 | Skunk botia (1,<br>2)         | <i>Yasuhikotakia<br/>morleti</i>         | <i>Yasuhikotakia<br/>morleti</i>         | Match                              | <i>Yasuhikotakia<br/>morleti</i>         | Match                              |
| 186128 | KU569038 | BOLD:<br>AAZ4953 | FWAQ075-11                | Mochokidae     | Africa             | S. Eupterus afr             | Featherfin<br>squeaker (1)    | <i>Synodontis<br/>eupterus</i>           | <i>Synodontis<br/>eupterus</i>           | Match                              | <i>Synodontis<br/>eupterus</i>           | Match                              |
| 186129 | KU568765 | BOLD:<br>AAU5506 | FWAQ076-11,<br>FWAQ077-11 | Cyprinidae     | Asia               | Bala shark                  | Bala shark (1, 2)             | <i>Balantiocheilos<br/>melanopterus</i>  | <i>Balantiocheilos<br/>melanopterus</i>  | Match                              | <i>Balantiocheilos<br/>melanopterus</i>  | Match                              |
| 186130 | KU568825 | BOLD:<br>AAV6832 | FWAQ078-11,<br>FWAQ079-11 | Cyprinidae     | Europe<br>and Asia | Doctor catfish              | Doctor fish (2)               | <i>Garra rufa</i>                        | <i>Garra rufa</i>                        | Match                              | <i>Garra rufa</i>                        | Match                              |
| 186132 | KU568780 | BOLD:<br>AAZ4704 | FWAQ080-11,<br>FWAQ081-11 | Tetraodontidae | Asia               | Dwarf yellow<br>pufferfish  | Malabar<br>pufferfish (2)     | <i>Carinotetraodon<br/>travancoricus</i> | <i>Carinotetraodon<br/>travancoricus</i> | Match                              | <i>Carinotetraodon<br/>travancoricus</i> | Match                              |
| 186133 | KU568977 | BOLD:<br>AAZ3813 | FWAQ082-11,<br>FWAQ083-11 | Characidae     | South<br>America   | Glass bloodfin<br>tetra     | Bloodfin tetra<br>(1)         | <i>Aphyocharax<br/>anisitsi</i>          |                                          | No genetic<br>ID                   |                                          | No genetic<br>ID                   |
| 186134 | KU568848 | BOLD:<br>AAX1434 | FWAQ084-11,<br>FWAQ085-11 | Characidae     | South<br>America   | Glowlight tetra             | Glowlight tetra<br>(1, 2)     | <i>Hemigrammus<br/>erythrozonus</i>      |                                          | No genetic<br>ID                   |                                          | No genetic<br>ID                   |
| 186135 | KU568892 | BOLD:<br>AAV6657 | FWAQ086-11,<br>FWAQ128-11 | Cyprinidae     | Asia               | Black shark                 | Black shark (1,<br>2)         | <i>Labeo<br/>chrysophekadion</i>         | <i>Labeo<br/>chrysophekadion</i>         | Match                              | <i>Labeo<br/>chrysophekadion</i>         | Match                              |
| 186136 | KU568975 | BOLD:<br>AAH7765 | FWAQ087-11,<br>FWAQ088-11 | Polypteridae   | Africa             | Polypterus afr              | not available                 | <i>Polypterus sp.</i>                    | <i>Polypterus<br/>senegalus</i>          | Ambiguous<br>trade name            | <i>Polypterus<br/>senegalus</i>          | Ambiguous<br>trade name            |
| 186137 | KU568951 | BOLD:<br>AAE3237 | FWAQ089-11,<br>FWAQ090-11 | Pangasiidae    | Asia               | Pangasius<br>catfish        | not available                 | <i>Pangasius sp.</i>                     | <i>Pangasius<br/>hypophthalmus</i>       | Ambiguous<br>trade name            | <i>Pangasius<br/>hypophthalmus</i>       | Ambiguous<br>trade name            |
| 186138 | KU568747 | BOLD:<br>AAZ4730 | FWAQ091-11,<br>FWAQ125-11 | Loricariidae   | South<br>America   | Ancistrus gold<br>catfish   | Bristlenose<br>catfish (2,3)  | <i>Ancistrus sp.</i>                     |                                          | No genetic<br>ID                   | <i>Ancistrus sp.</i>                     | Ambiguous<br>trade name            |
| 186139 | KU568770 | BOLD:<br>AAK1517 | FWAQ092-11,<br>FWAQ093-11 | Cobitidae      | Asia               | Pakistani loach             | Pakistani loach<br>(2)        | <i>Botia almorhae</i>                    |                                          | No genetic<br>ID                   | <i>Botia lohachata</i>                   | Mismatch                           |
| 186140 | KU568967 | BOLD:<br>AAX2832 | FWAQ094-11,<br>FWAQ100-11 | Cichlidae      | Africa             | Milomo<br>malawi cichlid    | Placidochromis<br>milomo (2)  | <i>Placidochromis<br/>milomo</i>         |                                          | No genetic<br>ID (Malawi<br>group) |                                          | No genetic<br>ID (Malawi<br>group) |
| 186141 | KU569077 | BOLD:<br>AAB8020 | FWAQ095-11                | Poeciliidae    | North<br>America   | Green<br>swordtail          | Swordtail (1, 2,<br>3)        | <i>Xiphophorus<br/>hellerii</i>          | <i>Xiphophorus<br/>hellerii</i>          | Match                              | <i>Xiphophorus<br/>hellerii</i>          | Match                              |
| 186145 | KU568796 | BOLD:<br>AAZ4976 | FWAQ096-11,<br>FWAQ097-11 | Callichthyidae | South<br>America   | Panda cory<br>catfish       | Panda corydoras<br>(1, 2)     | <i>Corydoras<br/>panda</i>               |                                          | No genetic<br>ID                   |                                          | No genetic<br>ID                   |
| 186147 | KU568880 | BOLD:<br>AAX1886 | FWAQ098-11,<br>FWAQ099-11 | Characidae     | South<br>America   | Black phantom<br>tetra      | Black phantom<br>tetra (1, 2) | <i>Hyphessobrycon<br/>megalopterus</i>   | <i>Hyphessobrycon<br/>megalopterus</i>   | Match                              | <i>Hyphessobrycon<br/>megalopterus</i>   | Match                              |
| 186149 | KU568911 | BOLD:<br>AAX2832 | FWAQ101-11,<br>FWAQ102-11 | Cichlidae      | Africa             | Lombardoi<br>malawi cichlid | Maylandia<br>lombardoi (2)    | <i>Maylandia<br/>lombardoi</i>           |                                          | No genetic<br>ID (Malawi<br>group) |                                          | No genetic<br>ID (Malawi<br>group) |
| 186151 | KU568915 | BOLD:<br>AAX2832 | FWAQ104-11,<br>FWAQ143-11 | Cichlidae      | Africa             | Chipokae<br>malawi cichlid  | Melanochromis<br>chipokae (2) | <i>Melanochromis<br/>chipokae</i>        |                                          | No genetic<br>ID (Malawi<br>group) |                                          | No genetic<br>ID (Malawi<br>group) |

|        |          |                  |                                                         |                |                  |                                         |                                      |                                                            |                                           |                                    |                                           |                                    |
|--------|----------|------------------|---------------------------------------------------------|----------------|------------------|-----------------------------------------|--------------------------------------|------------------------------------------------------------|-------------------------------------------|------------------------------------|-------------------------------------------|------------------------------------|
| 186153 | KU569044 | BOLD:<br>AAW6600 | FWAQ107-11,<br>FWAQ108-11                               | Characidae     | South<br>America | Penguin tetra                           | Penguin tetra<br>(2)                 | <i>Thayeria<br/>boehlkei</i> ;<br><i>Thayeria obliqua</i>  | <i>Thayeria<br/>boehlkei</i>              | Ambiguous<br>trade name            | <i>Thayeria<br/>boehlkei</i>              | Ambiguous<br>trade name            |
| 186155 | KU568862 | BOLD:<br>AAI8612 | FWAQ105-11,<br>FWAQ106-11                               | Characidae     | South<br>America | Columbian red<br>finned tetra           | Colombian tetra<br>(1, 2)            | <i>Hyphessobrycon<br/>columbianus</i>                      |                                           | No genetic<br>ID                   |                                           | No genetic<br>ID                   |
| 186156 | KU569028 | BOLD:<br>AAE9147 | FWAQ109-11,<br>FWAQ114-11                               | Cichlidae      | South<br>America | Yellow pigeon<br>blood discus           | Discus (1)                           | <i>Symphysodon<br/>discus</i>                              | <i>Symphysodon<br/>discus</i>             | Match                              | <i>Symphysodon<br/>discus</i>             | Match                              |
| 186157 | KU568789 | BOLD:<br>AAZ7556 | FWAQ110-11,<br>FWAQ111-11                               | Callichthyidae | South<br>America | Albino cory<br>catfish                  | not available                        | <i>Corydoras sp.</i>                                       | <i>Corydoras<br/>aeneus</i>               | Ambiguous<br>trade name            | <i>Corydoras sp</i>                       | Ambiguous<br>trade name            |
| 186180 | KU568952 | BOLD:<br>AAZ7854 | FWAQ112-11                                              | Pangasiidae    | Asia             | Hifin<br>pangasius<br>catfish           | not available                        | <i>Pangasius sp.</i>                                       | <i>Pangasius<br/>sanitwongsei</i>         | Ambiguous<br>trade name            | <i>Pangasius<br/>sanitwongsei</i>         | Ambiguous<br>trade name            |
| 186182 | KU568792 | BOLD:<br>AAZ9401 | FWAQ115-11,<br>FWAQ116-11                               | Callichthyidae | South<br>America | Julii cory<br>catfish                   | Julii corydoras<br>(2)               | <i>Corydoras julii</i>                                     |                                           | No genetic<br>ID                   |                                           | No genetic<br>ID                   |
| 186183 | KU568794 | BOLD:<br>AAC7264 | FWAQ117-11,<br>FWAQ118-11                               | Callichthyidae | South<br>America | Pepper cory<br>catfish                  | Peppered<br>corydoras (1, 2)         | <i>Corydoras<br/>paleatus</i>                              | <i>Corydoras<br/>paleatus</i>             | Match                              | <i>Corydoras<br/>paleatus</i>             | Match                              |
| 186184 | KU568874 | BOLD:<br>AAX1888 | FWAQ119-11,<br>FWAQ120-11,<br>FWAQ334-12,<br>FWAQ335-12 | Characidae     | South<br>America | Black neon<br>tetra                     | Black neon tetra<br>(1, 2)           | <i>Hyphessobrycon<br/>herbertaxelrodi</i>                  | <i>Hyphessobrycon<br/>herbertaxelrodi</i> | Match                              | <i>Hyphessobrycon<br/>herbertaxelrodi</i> | Match                              |
| 186185 | KU568787 | BOLD:<br>ADB0100 | FWAQ121-11,<br>FWAQ122-11                               | Callichthyidae | South<br>America | Bronze cory<br>catfish                  | Bronze<br>corydoras (1, 2)           | <i>Corydoras<br/>aeneus</i>                                |                                           | No genetic<br>ID                   |                                           | No genetic<br>ID                   |
| 186186 | KU568835 | BOLD:<br>AAE3728 | FWAQ123-11,<br>FWAQ124-11                               | Characidae     | South<br>America | Albino widow<br>tetra                   | Black widow<br>tetra (1)             | <i>Gymnocorymbus<br/>ternetzi</i>                          | <i>Gymnocorymbus<br/>ternetzi</i>         | Match                              | <i>Gymnocorymbus<br/>ternetzi</i>         | Match                              |
| 186188 | KU569010 | BOLD:<br>AAD9761 | FWAQ126-11,<br>FWAQ127-11                               | Cyprinidae     | Asia             | Tiger barb                              | Tiger barb (1, 2)                    | <i>Puntigrus<br/>tetrazona</i>                             | <i>Puntius<br/>tetrazona</i>              | Match                              | <i>Puntigrus<br/>tetrazona</i>            | Match                              |
| 186189 | KU568755 | BOLD:<br>AAJ1815 | FWAQ129-11,<br>FWAQ130-11                               | Apteronotidae  | South<br>America | Black ghost<br>knifefish                | Black ghost (1,<br>2, 3)             | <i>Apteronotus<br/>albifrons</i>                           | <i>Apteronotus<br/>albifrons</i>          | Match                              | <i>Apteronotus<br/>albifrons</i>          | Match                              |
| 186190 | KU568823 | BOLD:<br>AAZ7685 | FWAQ131-11,<br>FWAQ132-11                               | Cyprinidae     | Asia             | Algae eater<br>catfish                  | not available                        | No match                                                   |                                           | No genetic<br>ID                   |                                           | No genetic<br>ID                   |
| 186191 | KU568865 | BOLD:<br>AAC1024 | FWAQ133-11,<br>FWAQ134-11,<br>FWAQ378-12,<br>FWAQ379-12 | Characidae     | South<br>America | Serpae tetra                            | Jewel tetra (1),<br>Serpae tetra (2) | <i>Hyphessobrycon<br/>eques</i>                            | <i>Hyphessobrycon<br/>eques</i>           | Match                              | <i>Hyphessobrycon<br/>eques</i>           | Match                              |
| 186192 | KU568805 | BOLD:<br>ABY4094 | FWAQ135-11,<br>FWAQ136-11                               | Cichlidae      | Africa           | Blue dolphin<br>micro malawi<br>cichlid | Malawi blue<br>dolphin (2)           | <i>Cyrtocara<br/>moorii</i>                                |                                           | No genetic<br>ID (Malawi<br>group) |                                           | No genetic<br>ID (Malawi<br>group) |
| 186193 | KU568885 | BOLD:<br>AAZ9224 | FWAQ137-11,<br>FWAQ138-11                               | Characidae     | South<br>America | Rosy tetra                              | Rosy tetra (1, 2)                    | <i>Hyphessobrycon<br/>rosaceus</i> ; <i>H.<br/>bentosi</i> |                                           | No genetic<br>ID                   |                                           | No genetic<br>ID                   |
| 186194 | KU568894 | BOLD:<br>ABY4094 | FWAQ139-11,<br>FWAQ140-11                               | Cichlidae      | Africa           | Caeruleus<br>malawi cichlid             | Electric yellow<br>cichlid (2)       | <i>Labidochromis<br/>caeruleus</i>                         |                                           | No genetic<br>ID (Malawi<br>group) |                                           | No genetic<br>ID (Malawi<br>group) |
| 186195 | KU568910 | BOLD:<br>AAX2832 | FWAQ141-11,<br>FWAQ142-11                               | Cichlidae      | Africa           | Maylandi<br>malawi cichlid              | not available                        | No match                                                   |                                           | No genetic<br>ID (Malawi<br>group) |                                           | No genetic<br>ID (Malawi<br>group) |
| 186198 | KU568815 | BOLD:<br>ABY4094 | FWAQ144-11,<br>FWAQ145-11                               | Cichlidae      | Africa           | Compres-<br>siceps malawi<br>cichlid    | Malawi<br>compressiceps<br>(2)       | <i>Dimidiochromis<br/>compressiceps</i>                    |                                           | No genetic<br>ID (Malawi<br>group) |                                           | No genetic<br>ID (Malawi<br>group) |

|        |          |                  |                           |                 |                  |                              |                                           |                                       |                                                                 |                                    |                                       |                                    |
|--------|----------|------------------|---------------------------|-----------------|------------------|------------------------------|-------------------------------------------|---------------------------------------|-----------------------------------------------------------------|------------------------------------|---------------------------------------|------------------------------------|
| 186199 | KU568851 | BOLD:<br>AAZ9269 | FWAQ146-11,<br>FWAQ147-11 | Characidae      | South<br>America | Pretty garnet<br>tetra       | Garnet tetra (1,<br>2)                    | <i>Hemigrammus<br/>pulcher</i>        |                                                                 | No genetic<br>ID                   |                                       | No genetic<br>ID                   |
| 186206 | KU568943 | BOLD:<br>ABY4094 | FWAQ148-11,<br>FWAQ151-11 | Cichlidae       | Africa           | Venustus<br>malawi cichlid   | Venustus (2)                              | <i>Nimbochromis<br/>venustus</i>      |                                                                 | No genetic<br>ID (Malawi<br>group) |                                       | No genetic<br>ID (Malawi<br>group) |
| 186207 | KU568769 | BOLD:<br>AAA3560 | FWAQ149-11,<br>FWAQ150-11 | Osphronemidae   | Asia             | Siamese<br>fighting fish     | Siamese<br>fighting fish (1,<br>2, 3)     | <i>Betta splendens</i>                | <i>Betta splendens</i>                                          | Match                              | <i>Betta splendens</i>                | Match                              |
| 186209 | KU568999 |                  | FWAQ153-11                | Cyprinidae      | Asia             | Rosy barb                    | Rosy barb (1, 2)                          | <i>Pethia<br/>conchonius</i>          | <i>Pethia<br/>conchonius</i>                                    | Match                              | <i>Pethia<br/>conchonius</i>          | Match                              |
| 186210 | KU569017 | BOLD:<br>AAE7383 | FWAQ154-11,<br>FWAQ155-11 | Cyprinidae      | Asia             | Scissor tail<br>rasbora      | Scissortail<br>rasbora (1, 2)             | <i>Rasbora<br/>trilineata</i>         |                                                                 | No genetic<br>ID                   | <i>Rasbora<br/>trilineata</i>         | Match                              |
| 186211 | KU568810 | BOLD:<br>AAE3739 | FWAQ156-11,<br>FWAQ157-11 | Cyprinidae      | Asia             | Zebra danio                  | Zebra danio (1)                           | <i>Danio rerio</i>                    | <i>Danio rerio</i>                                              | Match                              | <i>Danio rerio</i>                    | Match                              |
| 186212 | KU568993 | BOLD:<br>ACE6253 | FWAQ159-11,<br>FWAQ158-11 | Loricariidae    | South<br>America | Unknown<br>catfish           | not available                             | No match                              | <i>Pterygoplichthys<br/>disjunctivus</i>                        | Ambiguous<br>trade name            | <i>Pterygoplichthys<br/>sp.</i>       | Ambiguous<br>trade name            |
| 186213 | KU568808 | BOLD:<br>AAE3739 | FWAQ160-11,<br>FWAQ161-11 | Cyprinidae      | Asia             | Leopard danio                | Leopard danio<br>(1)                      | <i>Danio rerio</i>                    | <i>Danio rerio</i>                                              | Match                              | <i>Danio rerio</i>                    | Match                              |
| 186214 | KU568811 | BOLD:<br>AAE3739 | FWAQ162-11,<br>FWAQ163-11 | Cyprinidae      | Asia             | Longfin zebra<br>danio       | Zebra danio (1)                           | <i>Danio rerio</i>                    | <i>Danio rerio</i>                                              | Match                              | <i>Danio rerio</i>                    | Match                              |
| 186215 | KU568925 | BOLD:<br>AAX4397 | FWAQ164-11,<br>FWAQ165-11 | Melanotaeniidae | Asia             | Neon dwarf<br>rainbowfish    | Dwarf neon<br>rainbow (2)                 | <i>Melanotaenia<br/>praecox</i>       | <i>Melanotaenia<br/>praecox</i>                                 | Match                              | <i>Melanotaenia<br/>praecox</i>       | Match                              |
| 186216 | KU569042 | BOLD:<br>AAV7040 | FWAQ167-11                | Cyprinidae      | Asia             | Longfin white<br>cloud danio | White cloud<br>mountain<br>minnow (1)     | <i>Tanichthys<br/>albonubes</i>       | <i>Tanichthys<br/>albonubes</i>                                 | Match                              | <i>Tanichthys<br/>albonubes</i>       | Match                              |
| 186218 | KU568982 | BOLD:<br>ACF4350 | FWAQ170-11,<br>FWAQ171-11 | Ambassidae      | Asia             | Black eye tetra              | not available                             | No match                              |                                                                 | No genetic<br>ID                   |                                       | No genetic<br>ID                   |
| 186219 | KU568998 | BOLD:<br>AAU3665 | FWAQ172-11                | Cyprinidae      | Asia             | Spanner barb                 | Spanner barb (1,<br>2)                    | <i>Barbodes<br/>lateristriga</i>      | <i>Puntius banksi</i> ,<br><i>Puntius aff.</i><br><i>banksi</i> | Mismatch                           | <i>Puntius<br/>binotatus</i>          | Mismatch                           |
| 186220 | KU568841 | BOLD:<br>AAY2122 | FWAQ173-11,<br>FWAQ174-11 | Characidae      | South<br>America | Silver tip tetra             | Silver-tip tetra<br>(1, 2)                | <i>Hasemanian nana</i>                | <i>Hasemanian nana</i>                                          | Match                              | <i>Hasemanian nana</i>                | Match                              |
| 186221 | KU569043 | BOLD:<br>AAV7040 | FWAQ175-11,<br>FWAQ176-11 | Cyprinidae      | Asia             | White cloud<br>danio         | White cloud<br>mountain<br>minnow (1)     | <i>Tanichthys<br/>albonubes</i>       | <i>Tanichthys<br/>albonubes</i>                                 | Match                              | <i>Tanichthys<br/>albonubes</i>       | Match                              |
| 186222 | KU569029 | BOLD:<br>AAE9147 | FWAQ177-11,<br>FWAQ178-11 | Cichlidae       | South<br>America | Turquoise<br>discus          | Discus (1)                                | <i>Symphysodon<br/>discus</i>         | <i>Symphysodon<br/>discus</i>                                   | Match                              | <i>Symphysodon<br/>discus</i>         | Match                              |
| 186223 | KU569067 | BOLD:<br>AAJ8936 | FWAQ179-11,<br>FWAQ180-11 | Cyprinidae      | Asia             | Harlequin<br>rasbora         | Harlequin<br>rasbora (1, 2)               | <i>Trigonostigma<br/>heteromorpha</i> | <i>Trigonostigma<br/>heteromorpha</i>                           | Match                              | <i>Trigonostigma<br/>heteromorpha</i> | Match                              |
| 186224 | KU569064 | BOLD:<br>AAW0021 | FWAQ181-11,<br>FWAQ182-11 | Osphronemidae   | Asia             | Gold gourami                 | Gold gourami<br>(1), Cosby<br>gourami (1) | <i>Trichopodus<br/>trichopterus</i>   |                                                                 | No genetic<br>ID                   | <i>Trichopodus<br/>trichopterus</i>   | Match                              |
| 186225 | KU568904 | BOLD:<br>AAZ9422 | FWAQ183-11,<br>FWAQ303-12 | Osphronemidae   | Asia             | Paradise<br>gourami          | Paradise fish (2,<br>3)                   | <i>Macropodus<br/>opercularis</i>     |                                                                 | No genetic<br>ID                   |                                       | No genetic<br>ID                   |
| 186226 | KU568833 | BOLD:<br>AAE3728 | FWAQ184-11,<br>FWAQ185-11 | Characidae      | South<br>America | Black widow<br>tetra         | Black widow<br>tetra (1)                  | <i>Gymnocorymbus<br/>ternetzi</i>     | <i>Gymnocorymbus<br/>ternetzi</i>                               | Match                              | <i>Gymnocorymbus<br/>ternetzi</i>     | Match                              |
| 186227 | KU569083 | BOLD:<br>AAB7239 | FWAQ186-11                | Poeciliidae     | North<br>America | Red platy                    | Southern platy<br>(2)                     | <i>Xiphophorus<br/>maculatus</i>      | <i>Xiphophorus<br/>maculatus</i>                                | Match                              | <i>Xiphophorus<br/>maculatus</i>      | Match                              |

|        |          |                  |                           |                 |                  |                             |                                            |                                       |                                    |                                    |                                     |                                    |
|--------|----------|------------------|---------------------------|-----------------|------------------|-----------------------------|--------------------------------------------|---------------------------------------|------------------------------------|------------------------------------|-------------------------------------|------------------------------------|
| 186228 | KU568920 | BOLD:<br>ABZ2045 | FWAQ187-11,<br>FWAQ188-11 | Melanotaeniidae | Asia             | Boesmani<br>rainbow fish    | Boeseman's<br>rainbowfish (1)              | <i>Melanotaenia<br/>boesemani</i>     | <i>Melanotaenia<br/>boesemani</i>  | Match                              | <i>Melanotaenia<br/>boesemani</i>   | Match                              |
| 186241 | KU568954 | BOLD:<br>AAZ4561 | FWAQ057-11,<br>FWAQ058-11 | Cobitidae       | Asia             | Black khuli<br>loach        | Kuhlia loach (2)                           | <i>Pangio kuhlii</i>                  |                                    | No genetic<br>ID                   | <i>Pangio kuhlii</i>                | Match                              |
| 187216 | KU568921 | BOLD:<br>AAZ1408 | FWAQ248-12,<br>FWAQ249-12 | Characidae      | South<br>America | Blue rainbow<br>tetras      | not available                              | No match                              | <i>Melanotaenia<br/>monticola</i>  | Ambiguous<br>trade name            | <i>Melanotaenia<br/>boesemani</i>   | Ambiguous<br>trade name            |
| 187301 | KU569065 | BOLD:<br>AAW0021 | FWAQ238-12,<br>FWAQ239-12 | Osphronemidae   | Asia             | Golden sunset<br>gourami    | not available                              | No match                              |                                    | No genetic<br>ID                   | <i>Trichopodus<br/>trichopterus</i> | Match                              |
| 187303 | KU569039 | BOLD:<br>AAL5812 | FWAQ242-12,<br>FWAQ243-12 | Mochokidae      | Africa           | Upside down<br>catfish      | Upside down<br>catfish (1, 2)              | <i>Synodontis sp.</i>                 | <i>Synodontis<br/>nigrita</i>      | Ambiguous<br>trade name            | <i>Synodontis<br/>nigrita</i>       | Ambiguous<br>trade name            |
| 187304 | KU568843 | BOLD:<br>AAI6807 | FWAQ244-12,<br>FWAQ245-12 | Cichlidae       | Africa           | Blood red<br>cichlids       | not available                              | No match                              |                                    | No genetic<br>ID                   |                                     | No genetic<br>ID                   |
| 187305 | KU569076 | BOLD:<br>AAB8020 | FWAQ246-12,<br>FWAQ247-12 | Poeciliidae     | North<br>America | Koi swords                  | Swordtail (1, 2,<br>3)                     | <i>Xiphophorus<br/>hellerii</i>       | <i>Xiphophorus<br/>hellerii</i>    | Match                              | <i>Xiphophorus<br/>hellerii</i>     | Match                              |
| 187307 | KU568744 | BOLD:<br>AAA7015 | FWAQ250-12,<br>FWAQ251-12 | Cichlidae       | North<br>America | Parrot fish                 | not available                              | No match                              | <i>Amphilophus<br/>citrinellus</i> | Ambiguous<br>trade name            |                                     | No genetic<br>ID                   |
| 187308 | KU568800 | BOLD:<br>AAA7175 | FWAQ252-12,<br>FWAQ253-12 | Cyprinidae      | Asia             | Koi                         | Koi (1, 2)                                 | <i>Cyprinus carpio</i>                | <i>Cyprinus carpio</i>             | Match                              | <i>Cyprinus carpio</i>              | Match                              |
| 187309 | KU569070 | BOLD:<br>AAH8113 | FWAQ255-12                | Cichlidae       | Africa           | Duboisii                    | Tropheus<br>duboisii (2)                   | <i>Tropheus duboisii</i>              | <i>Tropheus duboisii</i>           | Match                              | <i>Tropheus duboisii</i>            | Match                              |
| 187311 | KU568929 | BOLD:<br>AAD0746 | FWAQ258-12,<br>FWAQ259-12 | Cichlidae       | South<br>America | Rams                        | Ram cichlid (1),<br>Ramirezi (2)           | <i>Mikrogeophagus<br/>ramirezi</i>    | <i>Mikrogeophagus<br/>ramirezi</i> | Match                              | <i>Mikrogeophagus<br/>ramirezi</i>  | Match                              |
| 187313 | KU568784 | BOLD:<br>ABX1865 | FWAQ262-12,<br>FWAQ263-12 | Cobitidae       | Asia             | Clown loaches               | Clown loach (1,<br>2)                      | <i>Chromobotia<br/>macracanthus</i>   |                                    | No genetic<br>ID                   |                                     | No genetic<br>ID                   |
| 187314 | KU568965 | BOLD:<br>ABX1360 | FWAQ264-12,<br>FWAQ265-12 | Pimelodidae     | South<br>America | Pimelodus<br>pictus catfish | Pictus cat (1),<br>Pictus<br>pimelodus (2) | <i>Pimelodus pictus</i>               | <i>Pimelodus pictus</i>            | Match                              | <i>Pimelodus pictus</i>             | Match                              |
| 187315 | KU569071 | BOLD:<br>ABX1875 | FWAQ268-12,<br>FWAQ269-12 | Cichlidae       | Africa           | Tropheus<br>moorii          | Tropheus<br>moorii (2, 3)                  | <i>Tropheus moorii</i>                |                                    | No genetic<br>ID                   |                                     | No genetic<br>ID                   |
| 187316 | KU568941 | BOLD:<br>ABX1894 | FWAQ270-12,<br>FWAQ271-12 | Cichlidae       | Africa           | Cylindricus                 | Neolamprologus<br>cylindricus (2)          | <i>Neolamprologus<br/>cylindricus</i> |                                    | No genetic<br>ID                   | <i>Neolamprologus<br/>furcifer</i>  | Mismatch                           |
| 187317 | KU568799 | BOLD:<br>AAX2832 | FWAQ272-12                | Cichlidae       | Africa           | Frontosa                    | Frontosa (2)                               | <i>Cyphotilapia<br/>frontosa</i>      |                                    | No genetic<br>ID (Malawi<br>group) |                                     | No genetic<br>ID (Malawi<br>group) |
| 187318 | KU569069 | BOLD:<br>ACE3775 | FWAQ274-12,<br>FWAQ275-12 | Cichlidae       | Africa           | Red band<br>moorii          | Tropheus<br>moorii (2, 3)                  | <i>Tropheus moorii</i>                |                                    | No genetic<br>ID                   | <i>Tropheus moorii</i>              | Match                              |
| 187319 | KU568907 | BOLD:<br>AAX2832 | FWAQ276-12,<br>FWAQ277-12 | Cichlidae       | Africa           | Metacalainos<br>cobalt      | Cobalt zebra (2)                           | <i>Maylandia<br/>callainos</i>        |                                    | No genetic<br>ID (Malawi<br>group) |                                     | No genetic<br>ID (Malawi<br>group) |
| 187322 | KU568776 | BOLD:<br>AAA7176 | FWAQ200-12,<br>FWAQ201-12 | Cyprinidae      | Asia             | Yellow comet<br>goldfish    | Goldfish (1, 2,<br>3)                      | <i>Carassius<br/>auratus</i>          | <i>Carassius<br/>auratus</i>       | Match                              | <i>Carassius<br/>auratus</i>        | Match                              |
| 187323 | KU568777 | BOLD:<br>AAA7176 | FWAQ202-12,<br>FWAQ203-12 | Cyprinidae      | Asia             | Black comet<br>goldfish     | Goldfish (1, 2,<br>3)                      | <i>Carassius<br/>auratus</i>          | <i>Carassius<br/>auratus</i>       | Match                              | <i>Carassius<br/>auratus</i>        | Match                              |
| 187324 | KU569034 | BOLD:<br>ABX1337 | FWAQ206-12,<br>FWAQ207-12 | Mochokidae      | Africa           | Synodontis<br>njassae       | not available                              | <i>Synodontis<br/>njassae</i>         | <i>Synodontis<br/>obesus</i>       | Mismatch                           | <i>Synodontis<br/>obesus</i>        | Mismatch                           |
| 187325 | KU569032 | BOLD:<br>ABX1337 | FWAQ208-12,<br>FWAQ209-12 | Mochokidae      | Africa           | Ocellated<br>synodontis     | Ocellated<br>synodontis (2)                | <i>Synodontis<br/>ocellifer</i>       | <i>Synodontis<br/>obesus</i>       | Mismatch                           | <i>Synodontis<br/>obesus</i>        | Mismatch                           |
| 187328 | KU568937 | BOLD:<br>AAX6108 | FWAQ214-12                | Characidae      | South<br>America | Emperor tetra               | Emperor tetra<br>(1, 2)                    | <i>Nematobrycon<br/>palmeri</i>       | <i>Nematobrycon<br/>palmeri</i>    | Match                              | <i>Nematobrycon<br/>palmeri</i>     | Match                              |

|        |          |                                       |                           |               |                  |                                |                                     |                                                             |                                             |                         |                                             |                         |
|--------|----------|---------------------------------------|---------------------------|---------------|------------------|--------------------------------|-------------------------------------|-------------------------------------------------------------|---------------------------------------------|-------------------------|---------------------------------------------|-------------------------|
| 187329 | KU568850 | BOLD:<br>ABX1928                      | FWAQ216-12,<br>FWAQ217-12 | Characidae    | South<br>America | Head and tail<br>tetra         | Head and tail<br>light tetra (2)    | <i>Hemigrammus<br/>ocellifer</i>                            |                                             | No genetic<br>ID        |                                             | No genetic<br>ID        |
| 187330 | KU568767 | BOLD:<br>AAE2136                      | FWAQ218-12,<br>FWAQ219-12 | Cyprinidae    | Asia             | Tinfoil barb                   | Tinfoil barb (1,<br>2, 3)           | <i>Barbonymus<br/>schwanenfeldii</i> ;<br><i>B. altus</i>   | <i>Barbonymus<br/>altus</i>                 | Ambiguous<br>trade name | <i>Barbonymus<br/>altus</i>                 | Ambiguous<br>trade name |
| 187331 | KU569003 | BOLD:<br>AAU0643;<br>BOLD:<br>ABY7455 | FWAQ220-12,<br>FWAQ221-12 | Cyprinidae    | Asia             | Melon barb                     | Melon barb (1,<br>2)                | <i>Haludaria<br/>fasciata</i>                               | <i>Haludaria<br/>fasciata</i>               | Match                   | <i>Haludaria<br/>fasciata</i>               | Match                   |
| 187332 | KU569016 | BOLD:<br>AAU2025                      | FWAQ222-12,<br>FWAQ223-12 | Cyprinidae    | Asia             | Cherry barb                    | Cherry barb (1,<br>2)               | <i>Puntius titteya</i>                                      | <i>Puntius titteya</i>                      | Match                   | <i>Puntius titteya</i>                      | Match                   |
| 187333 | KU568736 | BOLD:<br>ABX2317                      | FWAQ224-12,<br>FWAQ225-12 | Doradidae     | South<br>America | Spotted talking<br>catfish     | Spotted talking<br>catfish (2)      | <i>Agamyxis<br/>pectinifrons</i>                            |                                             | No genetic<br>ID        | <i>Agamyxis<br/>pectinifrons</i>            | Match                   |
| 187334 | KU568987 | BOLD:<br>AAA2588                      | FWAQ226-12,<br>FWAQ227-12 | Pimelodidae   | South<br>America | Tiger<br>shovelnose<br>catfish | Tiger<br>shovelnose<br>catfish (1)  | <i>Pseudoplatystoma<br/>fasciatum</i>                       |                                             | No genetic<br>ID        |                                             | No genetic<br>ID        |
| 187335 | KU568821 | BOLD:<br>ABX1866                      | FWAQ228-12,<br>FWAQ229-12 | Cyprinidae    | Asia             | Flying fox<br>catfish          | Flying fox (1, 2)                   | <i>Epalzeorhynchus<br/>kalopterus</i>                       | <i>Epalzeorhynchus<br/>kalopterus</i>       | Match                   | <i>Epalzeorhynchus<br/>kalopterus</i>       | Match                   |
| 187336 | KU568994 | BOLD:<br>ACE6253                      | FWAQ231-12,<br>FWAQ331-12 | Loricariidae  | South<br>America | Hifin<br>plecostomus           | Plecostomus (1,<br>2)               | <i>Hypostomus<br/>plecostomus</i>                           | <i>Pterygoplichthys<br/>disjunctivus</i>    | Mismatch                | <i>Pterygoplichthys<br/>disjunctivus</i>    | Mismatch                |
| 187337 | KU568853 | BOLD:<br>AAB0729                      | FWAQ232-12,<br>FWAQ233-12 | Cichlidae     | North<br>America | Texas cichlid                  | Texas cichlid<br>(1, 2)             | <i>Herichthys<br/>cyanoguttatus</i>                         | <i>Herichthys<br/>cyanoguttatus</i>         | Match                   | <i>Herichthys<br/>cyanoguttatus</i>         | Match                   |
| 187338 | KU568985 | BOLD:<br>AAA8511                      | FWAQ234-12,<br>FWAQ235-12 | Cichlidae     | Africa           | Egyptian<br>mouthbrooder       | Egyptian<br>mouth-brooder<br>(1, 2) | <i>Pseudocreni-<br/>labrus multicolor</i>                   | <i>Oreochromis<br/>mossambicus</i>          | Mismatch                | <i>Oreochromis<br/>mossambicus</i>          | Mismatch                |
| 187339 | KU568961 | BOLD:<br>ABX1906                      | FWAQ236-12,<br>FWAQ237-12 | Cichlidae     | Africa           | Kribensis<br>cichlid           | Kribensis (1)                       | <i>Pelvicachromis<br/>pulcher</i>                           |                                             | No genetic<br>ID        | <i>Pelvicachromis<br/>pulcher</i>           | Match                   |
| 187340 | KU568831 | BOLD:<br>AAE7054                      | FWAQ280-12,<br>FWAQ281-12 | Mormyridae    | Africa           | Elephant nose<br>fish          | Elephantnose<br>fish (1)            | <i>Gnathonemus<br/>petersii</i>                             | <i>Gnathonemus<br/>petersii</i>             | Match                   | <i>Gnathonemus<br/>petersii</i>             | Match                   |
| 187341 | KU568828 | BOLD:<br>ABX2318                      | FWAQ282-12,<br>FWAQ283-12 | Loricariidae  | South<br>America | Green butterfly<br>pleco       | not available                       | No match                                                    |                                             | No genetic<br>ID        |                                             | No genetic<br>ID        |
| 187342 | KU568963 | BOLD:<br>AAE6616                      | FWAQ284-12                | Alestidae     | Africa           | Congo tetra                    | Congo tetra (1,<br>2)               | <i>Phenaco-<br/>grammus<br/>interruptus</i>                 | <i>Phenaco-<br/>grammus<br/>interruptus</i> | Match                   | <i>Phenaco-<br/>grammus<br/>interruptus</i> | Match                   |
| 187343 | KU568818 | BOLD:<br>AAV6502                      | FWAQ285-12                | Cyprinidae    | Asia             | Albino<br>rainbow shark        | Rainbow shark<br>(1, 2)             | <i>Epalzeorhynchus<br/>frenatus</i>                         | <i>Epalzeorhynchus<br/>frenatus</i>         | Match                   | <i>Epalzeorhynchus<br/>frenatus</i>         | Match                   |
| 187344 | KU568857 | BOLD:<br>ABX1351                      | FWAQ286-12                | Cichlidae     | South<br>America | Golden deacon                  | Deacon (1)                          | <i>Heros severus</i>                                        | <i>Heros severus</i>                        | Match                   | <i>Heros severus</i>                        | Match                   |
| 187345 | KU568938 | BOLD:<br>AAG4618                      | FWAQ288-12,<br>FWAQ289-12 | Cichlidae     | Africa           | Brichardis                     | Neolamprologus<br>brichardi (2)     | <i>Neolamprologus<br/>brichardi</i>                         | <i>Neolamprologus<br/>brichardi</i>         | Match                   | <i>Neolamprologus<br/>brichardi</i>         | Match                   |
| 187346 | KU568775 | BOLD:<br>ABX1911                      | FWAQ290-12,<br>FWAQ291-12 | Cobitidae     | Asia             | Zebra loaches                  | Zebra loach (1)                     | <i>Botia striata</i> ;<br><i>Syncrossus<br/>hymenophysa</i> |                                             | No genetic<br>ID        | <i>Botia striata</i>                        | Match                   |
| 187347 | KU568763 | BOLD:<br>AAD8258                      | FWAQ292-12                | Cichlidae     | South<br>America | Tiger oscar                    | Oscar (1, 2)                        | <i>Astronotus<br/>ocellatus</i>                             |                                             | No genetic<br>ID        |                                             | No genetic<br>ID        |
| 187348 | KU568955 | BOLD:<br>AAF1698                      | FWAQ293-12,<br>FWAQ294-12 | Pantodontidae | Africa           | Butterfly fish                 | Freshwater<br>butterflyfish (2)     | <i>Pantodon<br/>buchholzi</i>                               | <i>Pantodon<br/>buchholzi</i>               | Match                   | <i>Pantodon<br/>buchholzi</i>               | Match                   |
| 187349 | KU568773 | BOLD:<br>AAK1517                      | FWAQ295-12,<br>FWAQ296-12 | Cobitidae     | Asia             | Yoyo loaches                   | not available                       | No match                                                    |                                             | No genetic<br>ID        |                                             | No genetic<br>ID        |

|        |          |                  |                           |                      |                     |                             |                                              |                                                                                      |                                                          |                                    |                                     |                                    |
|--------|----------|------------------|---------------------------|----------------------|---------------------|-----------------------------|----------------------------------------------|--------------------------------------------------------------------------------------|----------------------------------------------------------|------------------------------------|-------------------------------------|------------------------------------|
| 187350 | KU568906 | BOLD:<br>ABX2314 | FWAQ297-12,<br>FWAQ298-12 | Mastacem-<br>belidae | Asia                | Fire eel                    | Fire eel (1, 2)                              | <i>Mastacembelus<br/>erythrotaenia</i>                                               |                                                          | No genetic<br>ID                   |                                     | No genetic<br>ID                   |
| 187351 | KU568866 | BOLD:<br>AAC1024 | FWAQ300-12                | Characidae           | South<br>America    | Bleeding heart<br>tetras    | Bleeding heart<br>tetra (1)                  | <i>Hyphessobrycon<br/>erythrostigma</i>                                              | <i>Hyphessobrycon<br/>eques</i>                          | Mismatch                           | <i>Hyphessobrycon<br/>eques</i>     | Mismatch                           |
| 187352 | KU568890 | BOLD:<br>ABX1365 | FWAQ301-12,<br>FWAQ302-12 | not determined       | not deter-<br>mined | Ghost/glass<br>catfish      | Glass catfish (1,<br>2)                      | <i>Kryptopterus<br/>bicirrhis; Ompok<br/>bimaculatus;<br/>Parailia<br/>pellucida</i> |                                                          | No genetic<br>ID                   |                                     | No genetic<br>ID                   |
| 187547 | KU568801 | BOLD:<br>AAA7175 | FWAQ204-12,<br>FWAQ205-12 | Cyprinidae           | Asia                | Mixed koi                   | Koi (1, 2)                                   | <i>Cyprinus carpio</i>                                                               | <i>Cyprinus carpio</i>                                   | Match                              | <i>Cyprinus carpio</i>              | Match                              |
| 187548 | KU568895 | BOLD:<br>AAX2832 | FWAQ278-12,<br>FWAQ279-12 | Cichlidae            | Africa              | Labidochromis<br>chisumulae | Labidochromis<br>chisumulae (2)              | <i>Labidochromis<br/>chisumulae</i>                                                  |                                                          | No genetic<br>ID (Malawi<br>group) |                                     | No genetic<br>ID (Malawi<br>group) |
| 187549 | KU568845 | BOLD:<br>ABX1927 | FWAQ210-12,<br>FWAQ211-12 | Characidae           | South<br>America    | Rummy nose<br>tetra         | Rummy-nose<br>tetra (1, 2, 3)                | <i>Hemigrammus<br/>bleheri;<br/>Hemigrammus<br/>rhodostomus</i>                      |                                                          | No genetic<br>ID                   | <i>Hemigrammus<br/>bleheri</i>      | Ambiguous<br>trade name            |
| 187550 | KU568958 | BOLD:<br>AAX2701 | FWAQ212-12,<br>FWAQ213-12 | Characidae           | South<br>America    | Cardinal tetra              | Cardinal tetra<br>(1, 2)                     | <i>Paracheiroduon<br/>axelrodi</i>                                                   | <i>Paracheiroduon<br/>axelrodi</i>                       | Match                              | <i>Paracheiroduon<br/>axelrodi</i>  | Match                              |
| 188655 | KU568944 | BOLD:<br>AAF2803 | FWAQ374-12                | Notopteridae         | Asia                | Indian<br>knife fish        | Asiatic knife fish<br>(1), Knife fish<br>(1) | <i>Notopterus<br/>notopterus;<br/>Chitala chitala</i>                                | <i>Notopterus<br/>notopterus</i>                         | Ambiguous<br>trade name            | <i>Notopterus<br/>notopterus</i>    | Ambiguous<br>trade name            |
| 188658 | KU568948 | BOLD:<br>ABY4094 | FWAQ376-12,<br>FWAQ377-12 | Cichlidae            | Africa              | Zimbabwe<br>rock cichlid    | not available                                | No match                                                                             |                                                          | No genetic<br>ID (Malawi<br>group) |                                     | No genetic<br>ID (Malawi<br>group) |
| 188661 | KU568748 | BOLD:<br>AAZ4730 | FWAQ380-12                | Loricariidae         | South<br>America    | Bristlenose<br>catfish      | Bristlenose<br>catfish (2,3)                 | <i>Ancistrus sp.</i>                                                                 |                                                          | No genetic<br>ID                   | <i>Ancistrus sp.</i>                | Ambiguous<br>trade name            |
| 188662 | KU568745 | BOLD:<br>AAZ4730 | FWAQ381-12                | Loricariidae         | South<br>America    | Albino<br>ancistrus         | Bristlenose<br>catfish (2,3)                 | <i>Ancistrus sp.</i>                                                                 |                                                          | No genetic<br>ID                   | <i>Ancistrus sp.</i>                | Ambiguous<br>trade name            |
| 188663 | KU568749 | BOLD:<br>AAZ4730 | FWAQ382-12                | Loricariidae         | South<br>America    | Longfin<br>ancistrus        | Bristlenose<br>catfish (2,3)                 | <i>Ancistrus sp.</i>                                                                 |                                                          | No genetic<br>ID                   | <i>Ancistrus sp.</i>                | Ambiguous<br>trade name            |
| 188665 | KU568856 | BOLD:<br>ABZ1610 | FWAQ304-12,<br>FWAQ305-12 | Cichlidae            | South<br>America    | Gold deacon                 | Deacon (1)                                   | <i>Heros severus</i>                                                                 | <i>Heros severus</i>                                     | Match                              | <i>Heros severus</i>                | Match                              |
| 188667 | KU568830 | BOLD:<br>AAI7446 | FWAQ306-12,<br>FWAQ307-12 | Cichlidae            | South<br>America    | Geophagus                   | not available                                | <i>Geophagus sp.</i>                                                                 | <i>Geophagus<br/>surinamensis /<br/>G. cf. altifrons</i> | Ambiguous<br>trade name            | <i>Geophagus<br/>surinamensis</i>   | Ambiguous<br>trade name            |
| 188668 | KU569046 | BOLD:<br>AAA4760 | FWAQ308-12,<br>FWAQ309-12 | Cichlidae            | South<br>America    | Fire mouth                  | Firemouth<br>cichlid (1, 2)                  | <i>Thorichthys<br/>meeki</i>                                                         | <i>Thorichthys<br/>meeki</i>                             | Match                              | <i>Thorichthys<br/>meeki</i>        | Match                              |
| 188669 | KU568947 | BOLD:<br>AAF2199 | FWAQ310-12                | Osteoglossidae       | South<br>America    | Silver arowana              | Silver arowana<br>(2)                        | <i>Osteoglossum<br/>bicirrhosum</i>                                                  | <i>Osteoglossum<br/>bicirrhosum</i>                      | Match                              | <i>Osteoglossum<br/>bicirrhosum</i> | Match                              |
| 188670 | KU568750 | BOLD:<br>ACW5790 | FWAQ312-12                | Cichlidae            | South<br>America    | Green terror                | Green terror (1,<br>2), Goldsaum<br>(1)      | <i>Andinoacara<br/>rivulatus</i>                                                     | <i>Andinoacara<br/>rivulatus</i>                         | Match                              | <i>Andinoacara<br/>rivulatus</i>    | Match                              |
| 188672 | KU569025 | BOLD:<br>ABX1364 | FWAQ313-12,<br>FWAQ314-12 | not determined       | not deter-<br>mined | Glass catfish               | Glass catfish (1,<br>2)                      | <i>Kryptopterus<br/>bicirrhis; Ompok<br/>bimaculatus;<br/>Parailia<br/>pellucida</i> |                                                          | No genetic<br>ID                   |                                     | No genetic<br>ID                   |



|        |          |                  |                           |                       |                  |                                      |                                                |                                                                 |                                           |                         |                                           |                         |
|--------|----------|------------------|---------------------------|-----------------------|------------------|--------------------------------------|------------------------------------------------|-----------------------------------------------------------------|-------------------------------------------|-------------------------|-------------------------------------------|-------------------------|
| 188673 | KU568887 | BOLD:<br>AAW8825 | FWAQ315-12,<br>FWAQ316-12 | Melanotaeniidae       | Asia             | Threadfin<br>rainbow                 | Threadfin<br>rainbowfish (1,<br>2)             | <i>Iriatherina<br/>wernerii</i>                                 | <i>Iriatherina<br/>wernerii</i>           | Match                   | <i>Iriatherina<br/>wernerii</i>           | Match                   |
| 188674 | KU569079 | BOLD:<br>AAB8020 | FWAQ317-12,<br>FWAQ318-12 | Poeciliidae           | North<br>America | Jumbo swords                         | Swordtail (1, 2,<br>3)                         | <i>Xiphophorus<br/>hellerii</i>                                 | <i>Xiphophorus<br/>hellerii</i>           | Match                   | <i>Xiphophorus<br/>hellerii</i>           | Match                   |
| 188675 | KU568813 | BOLD:<br>AAO1582 | FWAQ319-12,<br>FWAQ320-12 | Zenarcho-<br>pteridae | Asia             | Albino half<br>beak                  | Halfbeak (1)                                   | <i>Dermogenys<br/>pusilla</i>                                   |                                           | No genetic<br>ID        |                                           | No genetic<br>ID        |
| 188676 | KU568791 | BOLD:<br>ABX1376 | FWAQ321-12,<br>FWAQ322-12 | Callichthyidae        | South<br>America | Elegans cory                         | Elegant<br>corydoras (1, 2)                    | <i>Corydoras<br/>elegans</i>                                    |                                           | No genetic<br>ID        |                                           | No genetic<br>ID        |
| 188677 | KU568945 | BOLD:<br>ABX1373 | FWAQ323-12,<br>FWAQ324-12 | Siluridae             | Asia             | Borneo glass<br>catfish              | Borneo glass<br>catfish (2)                    | <i>Ompok<br/>eugeneiatus</i>                                    |                                           | No genetic<br>ID        |                                           | No genetic<br>ID        |
| 188678 | KU569019 | BOLD:<br>AAF8852 | FWAQ325-12,<br>FWAQ326-12 | Loricariidae          | South<br>America | Whiptail<br>catfish                  | Whiptail catfish<br>(1)                        | <i>Farlowella acus</i>                                          |                                           | No genetic<br>ID        |                                           | No genetic<br>ID        |
| 188679 | KU569035 | BOLD:<br>ABX1337 | FWAQ327-12,<br>FWAQ328-12 | Mochokidae            | Africa           | Gippiceps                            | not available                                  | <i>No match</i>                                                 | <i>Synodontis<br/>obesus</i>              | Ambiguous<br>trade name | <i>Synodontis<br/>obesus</i>              | Ambiguous<br>trade name |
| 188680 | KU568968 | BOLD:<br>ACF4297 | FWAQ329-12,<br>FWAQ330-12 | Doradidae             | South<br>America | Talking catfish                      | Talking catfish<br>(1, 2)                      | <i>Acanthodoras<br/>spinosissimus</i> ; <i>A.<br/>depressus</i> | <i>Platydoras<br/>armatulus</i>           | Mismatch                | <i>Platydoras<br/>costatus</i>            | Mismatch                |
| 188682 | KU568759 | BOLD:<br>AAD8258 | FWAQ332-12,<br>FWAQ333-12 | Cichlidae             | South<br>America | Albino tiger<br>oscar                | Oscar (1, 2)                                   | <i>Astronotus<br/>ocellatus</i>                                 |                                           | No genetic<br>ID        |                                           | No genetic<br>ID        |
| 188684 | KU568878 | BOLD:<br>AAX1888 | FWAQ336-12,<br>FWAQ337-12 | Characidae            | South<br>America | Cocha blue<br>tetra                  | Cochu's blue<br>tetra (2)                      | <i>Boehlkea<br/>fredcochui</i>                                  | <i>Hyphessobrycon<br/>herbertaxelrodi</i> | Mismatch                | <i>Hyphessobrycon<br/>herbertaxelrodi</i> | Mismatch                |
| 188685 | KU568934 | BOLD:<br>AAB9504 | FWAQ338-12,<br>FWAQ339-12 | Characidae            | South<br>America | Red eye tetra                        | Red eye tetra<br>(2)                           | <i>Moenkhausia<br/>sanctaefilomenae</i>                         | <i>Moenkhausia<br/>sanctaefilomenae</i>   | Match                   | <i>Moenkhausia<br/>sanctaefilomenae</i>   | Match                   |
| 188690 | KU569001 | BOLD:<br>AAU1554 | FWAQ342-12,<br>FWAQ343-12 | Cyprinidae            | Asia             | Red line<br>torpedo barbs            | Red lined<br>torpedo fish (1)                  | <i>Sahyadria<br/>denisonii</i>                                  | <i>Puntius denisonii</i>                  | Match                   | <i>Sahyadria<br/>denisonii</i>            | Match                   |
| 188692 | KU568884 | BOLD:<br>AAZ4713 | FWAQ344-12,<br>FWAQ345-12 | Characidae            | South<br>America | Albino lemon<br>tetra                | Lemon tetra (1,<br>2)                          | <i>Hyphessobrycon<br/>pulchripinnis</i>                         |                                           | No genetic<br>ID        |                                           | No genetic<br>ID        |
| 188693 | KU569008 | BOLD:<br>AAU1058 | FWAQ346-12,<br>FWAQ347-12 | Cyprinidae            | Asia             | Chinese half<br>stripe barb          | Chinese barb (1,<br>2)                         | <i>Barbodes<br/>semifasciolatus</i>                             | <i>Puntius<br/>semifasciolatus</i>        | Match                   | <i>Barbodes<br/>semifasciolatus</i>       | Match                   |
| 188694 | KU568903 | BOLD:<br>AAE0545 | FWAQ348-12                | Mastacembe-<br>lidae  | Asia             | White spotted<br>spiny eel           | not available                                  | No match                                                        | <i>Macrogathus<br/>siamensis</i>          | Ambiguous<br>trade name | <i>Macrogathus<br/>siamensis</i>          | Ambiguous<br>trade name |
| 188695 | KU569075 | BOLD:<br>AAF4656 | FWAQ349-12,<br>FWAQ350-12 | Notopteridae          | Africa           | African knife<br>fish                | African<br>knifefish (1, 2)                    | <i>Xenomystus nigri</i>                                         | <i>Xenomystus nigri</i>                   | Match                   | <i>Xenomystus nigri</i>                   | Match                   |
| 188696 | KU569037 | BOLD:<br>ABX1337 | FWAQ351-12,<br>FWAQ352-12 | Mochokidae            | Africa           | <i>Synodontis<br/>nigromaculatus</i> | Leopard<br>synodontis (3)                      | <i>Synodontis<br/>nigromaculatus</i>                            | <i>Synodontis<br/>obesus</i>              | Mismatch                | <i>Synodontis<br/>obesus</i>              | Mismatch                |
| 188698 | KU569000 | BOLD:<br>AAO8787 | FWAQ355-12                | Cyprinidae            | Asia             | Fire barb                            | not available                                  | No match                                                        | <i>Pethia<br/>conchonius</i>              | Ambiguous<br>trade name | <i>Puntius<br/>conchonius</i>             | Ambiguous<br>trade name |
| 188700 | KU568923 | BOLD:<br>ACE8026 | FWAQ360-12,<br>FWAQ361-12 | Melanotaeniidae       | South<br>America | Parkinsons<br>rainbow                | Parkinson's<br>rainbowfish (1)                 | <i>Melanotaenia<br/>parkinsoni</i>                              | <i>Melanotaenia<br/>splendida</i>         | Mismatch                | <i>Melanotaenia<br/>parkinsoni</i>        | Match                   |
| 188701 | KU569049 | BOLD:<br>AAY7699 | FWAQ362-12,<br>FWAQ363-12 | Osphronemidae         | Asia             | Sunset gourami                       | Honey gourami<br>(2)                           | <i>Trichogaster<br/>chuna</i>                                   |                                           | No genetic<br>ID        | <i>Colisa lalia</i>                       | Mismatch                |
| 188702 | KU568837 | BOLD:<br>AAF7942 | FWAQ364-12,<br>FWAQ365-12 | Gyrinocheilidae       | Asia             | Chinese algae<br>eater               | Algae eater (1),<br>Chinese algae<br>eater (2) | <i>Gyrinocheilus<br/>aymonieri</i>                              | <i>Gyrinocheilus<br/>aymonieri</i>        | Match                   | <i>Gyrinocheilus<br/>aymonieri</i>        | Match                   |
| 188704 | KU569062 | BOLD:<br>AAW0021 | FWAQ368-12,<br>FWAQ369-12 | Osphronemidae         | Asia             | Cosby gourami                        | Gold gourami<br>(1), Cosby<br>gourami (1)      | <i>Trichopodus<br/>trichopterus</i>                             |                                           | No genetic<br>ID        | <i>Trichopodus<br/>trichopterus</i>       | Match                   |

|                |          |                  |                           |              |                  |             |                                            |                                   |                                          |                  |                                          |                  |
|----------------|----------|------------------|---------------------------|--------------|------------------|-------------|--------------------------------------------|-----------------------------------|------------------------------------------|------------------|------------------------------------------|------------------|
| 188705         | KU568981 | BOLD:<br>ACF4350 | FWAQ370-12,<br>FWAQ371-12 | Characidae   | South<br>America | X-ray tetra | X-ray tetra (1),<br>Pristella tetra<br>(2) | <i>Pristella<br/>maxillaris</i>   |                                          | No genetic<br>ID |                                          | No genetic<br>ID |
| 188706         | KU568992 | BOLD:<br>ACK1995 | FWAQ372-12,<br>FWAQ373-12 | Loricariidae | South<br>America | Pleco       | Plecostomus (1,<br>2)                      | <i>Hypostomus<br/>plecostomus</i> | <i>Pterygoplichthys<br/>disjunctivus</i> | Mismatch         | <i>Pterygoplichthys<br/>disjunctivus</i> | Mismatch         |
| 200335         | KU568898 | BOLD:<br>ABX2266 | FWAQ266-12,<br>FWAQ267-12 | Cichlidae    | Africa           | Lehini      | not available                              | No match                          |                                          | No genetic<br>ID |                                          | No genetic<br>ID |
| ES12-<br>AT078 | KU568902 | BOLD:<br>ABX1400 | FWAQ357-12,<br>FWAQ358-12 | Cyprinidae   | Asia             | Rainbow     | not available                              | No match                          |                                          | No genetic<br>ID |                                          | No genetic<br>ID |
